# Supplementary material for: Phase-field crystal modeling of graphene/hexagonal boron nitride interfaces
Source: Royal Society of Chemistry journal article supplement (doi:10.1039/d3cp05265f), 2024-01-01
Supplement: d3cp05265f1.pdf [file d3cp05265f1.pdf]

### Supporting information: Phase field crystal modeling of graphene/hexagonal boron nitride interfaces

Shrikant S. Channe

Shrikant Nanomaterials Research Pvt. Ltd., Nagpur-440024, India

#### Model parameters for hexagonal crystals

| Figure no. | $\epsilon_C$ | $\epsilon_{BN}$ | $\gamma_{C_{liquid}}$ | $\gamma_{C_{solid}}$ | $\gamma_{BN_{liquid}}$ | $\gamma_{BN_{solid}}$ | $\alpha_{B,C},$<br>$\alpha_{C,B}$ | $\gamma_{B,C},$<br>$\gamma_{C,B}$ | $\alpha_{N,C},$<br>$\alpha_{C,N}$ | $\gamma_{N,C},$<br>$\gamma_{C,N}$ | $\psi_{C_{liquid}}$ | $\psi_{C_{solid}}$ | $\psi_{BN_{liquid}}$ | $\psi_{BN_{solid}}$ |
|------------|--------------|-----------------|-----------------------|----------------------|------------------------|-----------------------|-----------------------------------|-----------------------------------|-----------------------------------|-----------------------------------|---------------------|--------------------|----------------------|---------------------|
| 2          | -0.15958     | -0.111595       | 0.071834              | -0.052149            | -0.071122              | 0.053162              | -0.12                             | 0.0                               | -0.12                             | 0.0                               | 0.283274            | 0.252912           | -0.419765            | -0.291116           |
| 3          | -0.228853    | -0.334086       | 0.074632              | -0.057991            | -0.088174              | 0.052073              | -0.12                             | 0.0                               | -0.12                             | 0.0                               | 0.289753            | 0.251905           | -0.517038            | -0.374479           |

where  $\psi_{C_{liquid}}$  represents the average density of liquid state of graphene,  $\psi_{C_{solid}}$  is the average density of solid state of graphene,  $\psi_{BN_{liquid}}$  is the average density of liquid state of h-BN, and  $\psi_{BN_{solid}}$  represents the average density of solid state of h-BN.

#### Model parameters for truncated triangular crystals

| Figure no. | $\epsilon_C$ | $\epsilon_{BN}$ | $\gamma_{C_{liquid}}$ | $\gamma_{C_{solid}}$ | $\gamma_{BN_{liquid}}$ | $\gamma_{BN_{solid}}$ | $\alpha_{B,C},$<br>$\alpha_{C,B}$ | $\gamma_{B,C},$<br>$\gamma_{C,B}$ | $\alpha_{N,C},$<br>$\alpha_{C,N}$ | $\gamma_{N,C},$<br>$\gamma_{C,N}$ | $\psi_{C_{liquid}}$ | $\psi_{C_{solid}}$ | $\psi_{BN_{liquid}}$ | $\psi_{BN_{solid}}$ |
|------------|--------------|-----------------|-----------------------|----------------------|------------------------|-----------------------|-----------------------------------|-----------------------------------|-----------------------------------|-----------------------------------|---------------------|--------------------|----------------------|---------------------|
| 4          | -0.223822    | -0.186534       | 0.072398              | -0.053071            | -0.093665              | 0.049625              | -0.183046                         | 0.045753                          | -0.12                             | 0.0                               | 0.281774            | 0.259026           | -0.464709            | -0.354672           |
| 5          | -0.223822    | -0.186534       | 0.072398              | -0.053071            | -0.093665              | 0.049625              | -0.12                             | 0.0                               | -0.183046                         | 0.045753                          | 0.281774            | 0.259026           | -0.464709            | -0.354672           |
| 6          | -0.230995    | -0.256036       | 0.074792              | -0.048257            | -0.078683              | 0.043032              | -0.157575                         | 0.062894                          | -0.12                             | 0.0                               | 0.284558            | 0.255753           | -0.474907            | -0.414532           |
| 7          | -0.230995    | -0.256036       | 0.074792              | -0.048257            | -0.078683              | 0.043032              | -0.12                             | 0.0                               | -0.157575                         | 0.062894                          | 0.284558            | 0.255753           | -0.474907            | -0.414532           |

### Model parameters for truncated triangular crystals

|    |           |           |          |           |           |          |           |          |           |          |          |          |           |           |
|----|-----------|-----------|----------|-----------|-----------|----------|-----------|----------|-----------|----------|----------|----------|-----------|-----------|
| 8  | -0.229479 | -0.305749 | 0.074961 | -0.041969 | -0.092629 | 0.049282 | -0.200349 | 0.052054 | -0.12     | 0.0      | 0.287176 | 0.257963 | -0.51293  | -0.36216  |
| 9  | -0.229479 | -0.305749 | 0.074961 | -0.041969 | -0.092629 | 0.049282 | -0.12     | 0.0      | -0.200349 | 0.052054 | 0.287176 | 0.257963 | -0.51293  | -0.36216  |
| 10 | -0.21496  | -0.395893 | 0.086914 | -0.053149 | -0.081019 | 0.053994 | -0.175488 | 0.077703 | -0.12     | 0.0      | 0.299732 | 0.253086 | -0.555927 | -0.356388 |
| 11 | -0.21496  | -0.395893 | 0.086914 | -0.053149 | -0.081019 | 0.053994 | -0.12     | 0.0      | -0.175488 | 0.077703 | 0.299732 | 0.253086 | -0.555927 | -0.356388 |

### Model parameters for triangular crystals

| Figure no. | $\epsilon_C$ | $\epsilon_{BN}$ | $\gamma_{C_{liquid}}$ | $\gamma_{C_{solid}}$ | $\gamma_{BN_{liquid}}$ | $\gamma_{BN_{solid}}$ | $\alpha_{B,C}, \alpha_{C,B}$ | $\gamma_{B,C}, \gamma_{C,B}$ | $\alpha_{N,C}, \alpha_{C,N}$ | $\gamma_{N,C}, \gamma_{C,N}$ | $\psi_{C_{liquid}}$ | $\psi_{C_{solid}}$ | $\psi_{BN_{liquid}}$ | $\psi_{BN_{solid}}$ |
|------------|--------------|-----------------|-----------------------|----------------------|------------------------|-----------------------|------------------------------|------------------------------|------------------------------|------------------------------|---------------------|--------------------|----------------------|---------------------|
| 12         | -0.167022    | -0.547672       | 0.076349              | -0.056206            | -0.073079              | 0.044255              | -0.249428                    | 0.038286                     | -0.12                        | 0.0                          | 0.296878            | 0.252925           | -0.616218            | -0.383265           |
| 13         | -0.167022    | -0.547672       | 0.076349              | -0.056206            | -0.073079              | 0.044255              | -0.12                        | 0.0                          | -0.249428                    | 0.038286                     | 0.296878            | 0.252925           | -0.616218            | -0.383265           |
| 14         | -0.224973    | -0.402736       | 0.083795              | -0.040526            | -0.098198              | 0.052531              | -0.209042                    | 0.071671                     | -0.12                        | 0.0                          | 0.292715            | 0.254977           | -0.538943            | -0.378668           |
| 15         | -0.224973    | -0.402736       | 0.083795              | -0.040526            | -0.098198              | 0.052531              | -0.12                        | 0.0                          | -0.209042                    | 0.071671                     | 0.292715            | 0.254977           | -0.538943            | -0.378668           |
| 16         | -0.216859    | -0.352195       | 0.073594              | -0.059287            | -0.098732              | 0.048703              | -0.266971                    | 0.041044                     | -0.12                        | 0.0                          | 0.280079            | 0.256785           | -0.548182            | -0.356935           |
| 17         | -0.216859    | -0.352195       | 0.073594              | -0.059287            | -0.098732              | 0.048703              | -0.12                        | 0.0                          | -0.266971                    | 0.041044                     | 0.280079            | 0.256785           | -0.548182            | -0.356935           |

### Model parameters for triangular jagged crystals

| Figure no. | $\epsilon_C$ | $\epsilon_{BN}$ | $\gamma_{C_{liquid}}$ | $\gamma_{C_{solid}}$ | $\gamma_{BN_{liquid}}$ | $\gamma_{BN_{solid}}$ | $\alpha_{B,C},$<br>$\alpha_{C,B}$ | $\gamma_{B,C},$<br>$\gamma_{C,B}$ | $\alpha_{N,C},$<br>$\alpha_{C,N}$ | $\gamma_{N,C},$<br>$\gamma_{C,N}$ | $\psi_{C_{liquid}}$ | $\psi_{C_{solid}}$ | $\psi_{BN_{liquid}}$ | $\psi_{BN_{solid}}$ |
|------------|--------------|-----------------|-----------------------|----------------------|------------------------|-----------------------|-----------------------------------|-----------------------------------|-----------------------------------|-----------------------------------|---------------------|--------------------|----------------------|---------------------|
| 18         | -0.196965    | -0.29042        | 0.072597              | -0.044556            | -0.070802              | 0.057816              | -0.22925                          | 0.037588                          | -0.12                             | 0.0                               | 0.282786            | 0.251068           | -0.489828            | -0.435001           |
| 19         | -0.196965    | -0.29042        | 0.072597              | -0.044556            | -0.070802              | 0.057816              | -0.12                             | 0.0                               | -0.22925                          | 0.037588                          | 0.282786            | 0.251068           | -0.489828            | -0.435001           |

### Model parameters for supporting information

#### Contents

1. Hexagonal h-BN crystals with single and multiple layers
2. Multilayer jagged triangular crystals

### Model parameters for hexagonal h-BN crystals with single and multiple layers

| Figure no. | $\epsilon_C$ | $\epsilon_{BN}$ | $\gamma_{C_{liquid}}$ | $\gamma_{C_{solid}}$ | $\gamma_{BN_{liquid}}$ | $\gamma_{BN_{solid}}$ | $\alpha_{B,C},$<br>$\alpha_{C,B}$ | $\gamma_{B,C},$<br>$\gamma_{C,B}$ | $\alpha_{N,C},$<br>$\alpha_{C,N}$ | $\gamma_{N,C},$<br>$\gamma_{C,N}$ | $\psi_{C_{liquid}}$ | $\psi_{C_{solid}}$ | $\psi_{BN_{liquid}}$ | $\psi_{BN_{solid}}$ |
|------------|--------------|-----------------|-----------------------|----------------------|------------------------|-----------------------|-----------------------------------|-----------------------------------|-----------------------------------|-----------------------------------|---------------------|--------------------|----------------------|---------------------|
|------------|--------------|-----------------|-----------------------|----------------------|------------------------|-----------------------|-----------------------------------|-----------------------------------|-----------------------------------|-----------------------------------|---------------------|--------------------|----------------------|---------------------|

**Model parameters for hexagonal h-BN crystals with single and multiple layers**

|      |           |           |          |           |           |          |       |     |       |     |          |          |           |           |
|------|-----------|-----------|----------|-----------|-----------|----------|-------|-----|-------|-----|----------|----------|-----------|-----------|
| S.1  | -0.163363 | -0.282096 | 0.070165 | -0.047456 | -0.085766 | 0.048946 | -0.12 | 0.0 | -0.12 | 0.0 | 0.294354 | 0.255123 | -0.496608 | -0.358141 |
| S.2  | -0.19347  | -0.348853 | 0.079408 | -0.056102 | -0.072194 | 0.0559   | -0.12 | 0.0 | -0.12 | 0.0 | 0.299478 | 0.255731 | -0.507775 | -0.309232 |
| S.3  | -0.234486 | -0.303063 | 0.087854 | -0.049232 | -0.082104 | 0.04629  | -0.12 | 0.0 | -0.12 | 0.0 | 0.281286 | 0.255009 | -0.488791 | -0.316017 |
| S.4  | -0.196595 | -0.262365 | 0.070668 | -0.056781 | -0.080145 | 0.042274 | -0.12 | 0.0 | -0.12 | 0.0 | 0.284627 | 0.246777 | -0.462841 | -0.430125 |
| S.5  | -0.192275 | -0.311261 | 0.073331 | -0.049879 | -0.071732 | 0.058537 | -0.12 | 0.0 | -0.12 | 0.0 | 0.288787 | 0.249603 | -0.485752 | -0.362487 |
| S.6  | -0.163992 | -0.350473 | 0.081059 | -0.042846 | -0.077607 | 0.047931 | -0.12 | 0.0 | -0.12 | 0.0 | 0.291355 | 0.247824 | -0.492146 | -0.414443 |
| S.7  | -0.216684 | -0.353494 | 0.08855  | -0.059164 | -0.086036 | 0.052253 | -0.12 | 0.0 | -0.12 | 0.0 | 0.284885 | 0.24748  | -0.495003 | -0.357658 |
| S.8  | -0.156623 | -0.368561 | 0.083114 | -0.051556 | -0.075749 | 0.055546 | -0.12 | 0.0 | -0.12 | 0.0 | 0.290814 | 0.254076 | -0.51875  | -0.362763 |
| S.9  | -0.198403 | -0.276812 | 0.071228 | -0.053221 | -0.070372 | 0.045822 | -0.12 | 0.0 | -0.12 | 0.0 | 0.290819 | 0.257861 | -0.475742 | -0.364005 |
| S.10 | -0.229859 | -0.233182 | 0.082978 | -0.053568 | -0.071177 | 0.044479 | -0.12 | 0.0 | -0.12 | 0.0 | 0.282413 | 0.255706 | -0.472612 | -0.360508 |
| S.11 | -0.178794 | -0.399035 | 0.089572 | -0.045836 | -0.081847 | 0.051427 | -0.12 | 0.0 | -0.12 | 0.0 | 0.285779 | 0.246865 | -0.516831 | -0.384876 |
| S.12 | -0.238818 | -0.422435 | 0.085332 | -0.043547 | -0.07481  | 0.05809  | -0.12 | 0.0 | -0.12 | 0.0 | 0.287313 | 0.247261 | -0.546598 | -0.367689 |
| S.13 | -0.193625 | -0.382327 | 0.07839  | -0.051031 | -0.085808 | 0.041175 | -0.12 | 0.0 | -0.12 | 0.0 | 0.285476 | 0.258271 | -0.536733 | -0.34035  |

**Model parameters for multilayer jagged triangular crystals**

### Model parameters for multilayer jagged triangular crystals

| Figure no. | $\epsilon_C$ | $\epsilon_{BN}$ | $\gamma_{C_{liquid}}$ | $\gamma_{C_{solid}}$ | $\gamma_{BN_{liquid}}$ | $\gamma_{BN_{solid}}$ | $\alpha_{B,C},$<br>$\alpha_{C,B}$ | $\gamma_{B,C},$<br>$\gamma_{C,B}$ | $\alpha_{N,C},$<br>$\alpha_{C,N}$ | $\gamma_{N,C},$<br>$\gamma_{C,N}$ | $\psi_{C_{liquid}}$ | $\psi_{C_{solid}}$ | $\psi_{BN_{liquid}}$ | $\psi_{BN_{solid}}$ |
|------------|--------------|-----------------|-----------------------|----------------------|------------------------|-----------------------|-----------------------------------|-----------------------------------|-----------------------------------|-----------------------------------|---------------------|--------------------|----------------------|---------------------|
| S.2.1      | -0.197327    | -0.39235        | 0.071516              | -0.049434            | -0.081975              | 0.058222              | -0.192917                         | 0.077268                          | -0.12                             | 0.0                               | 0.291139            | 0.255959           | -0.523378            | -0.42061            |
| S.2.2      | -0.197327    | -0.39235        | 0.071516              | -0.049434            | -0.081975              | 0.058222              | -0.12                             | 0.0                               | -0.192917                         | 0.077268                          | 0.291139            | 0.255959           | -0.523378            | -0.42061            |
| S.2.3      | -0.171664    | -0.385224       | 0.075096              | -0.044481            | -0.083357              | 0.056888              | -0.244712                         | 0.099279                          | -0.12                             | 0.0                               | 0.285781            | 0.255077           | -0.540368            | -0.356119           |
| S.2.4      | -0.171664    | -0.385224       | 0.075096              | -0.044481            | -0.083357              | 0.056888              | -0.12                             | 0.0                               | -0.244712                         | 0.099279                          | 0.285781            | 0.255077           | -0.540368            | -0.356119           |
| S.2.5      | -0.234192    | -0.329991       | 0.075243              | -0.044407            | -0.095656              | 0.047296              | -0.209936                         | 0.043544                          | -0.12                             | 0.0                               | 0.284464            | 0.253543           | -0.503632            | -0.321436           |
| S.2.6      | -0.234192    | -0.329991       | 0.075243              | -0.044407            | -0.095656              | 0.047296              | -0.12                             | 0.0                               | -0.209936                         | 0.043544                          | 0.284464            | 0.253543           | -0.503632            | -0.321436           |
