# Supplementary material for: Phase-field crystal modeling of graphene/hexagonal boron nitride interfaces
Source: Royal Society of Chemistry journal article supplement (doi:10.1039/d3cp05265f), 2024-01-01
Supplement: d3cp05265f2.pdf [file d3cp05265f2.pdf]

## Supporting information: Phase field crystal modeling of graphene/hexagonal boron nitride interfaces

Shrikant S. Channe

Shrikant Nanomaterials Research Pvt. Ltd., Nagpur-440024, India

### Contents:

1. Hexagonal h-BN crystals with single and multiple layers
2. Multilayered jagged triangular crystals

### 1. Hexagonal h-BN crystals with single and multiple layers

In the following examples, the values for the interfacial couplings, i.e.,  $\alpha_{C,B}$ ,  $\alpha_{B,C}$ ,  $\alpha_{C,N}$  and  $\alpha_{N,C}$  and the third order coupling coefficients, i.e.,  $\gamma_{C,B}$ ,  $\gamma_{B,C}$ ,  $\gamma_{C,N}$  and  $\gamma_{N,C}$  was same. However, the values for the average density of liquid state of h-BN,  $\psi_{BN,liquid}$  and the average density of solid state of h-BN,  $\psi_{BN,solid}$  were increased in comparison to the average density of liquid state of graphene,  $\psi_{C,liquid}$  and the average density of solid state of graphene,  $\psi_{C,solid}$ . This resulted in the formation of different hexagonal shaped h-BN crystals. This includes crystals having a few atoms to multiple layers on the corners and on the edges.

#### S.1. Example 1

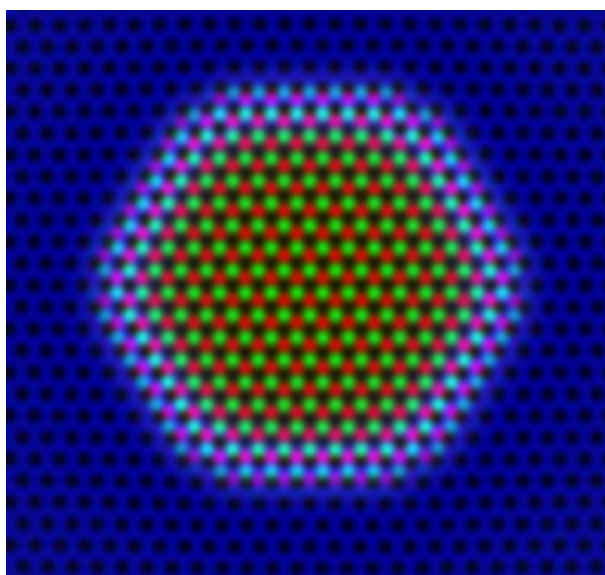

a.

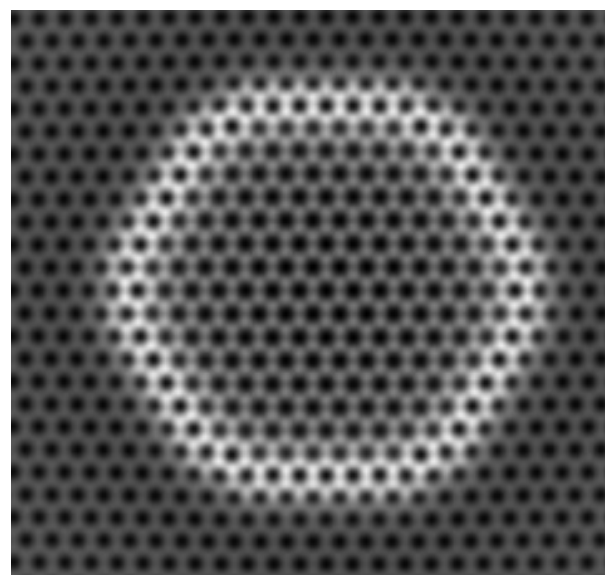

b.

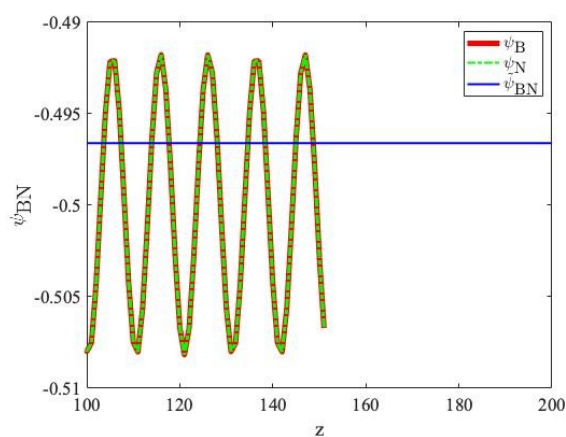

c.

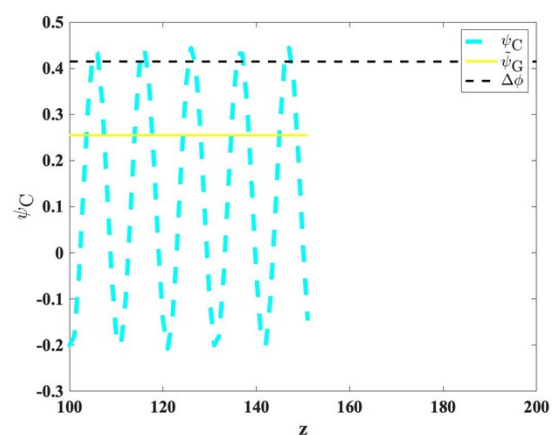

d.

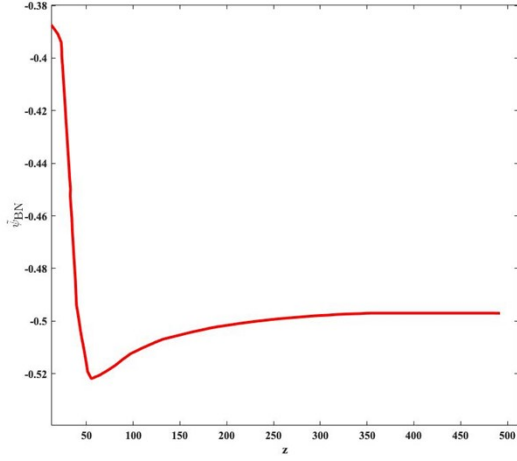

e.

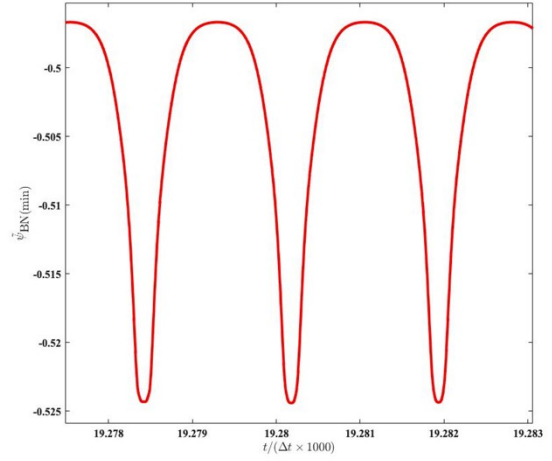

f.

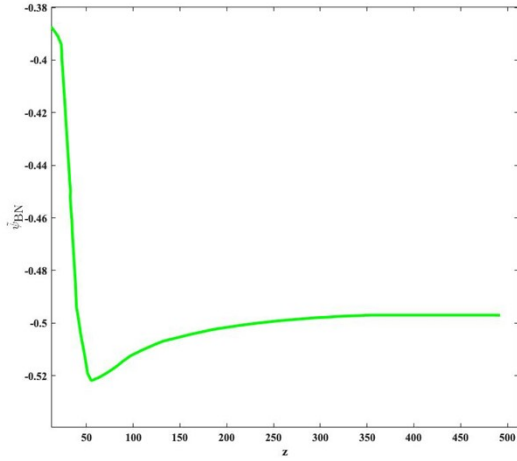

g.

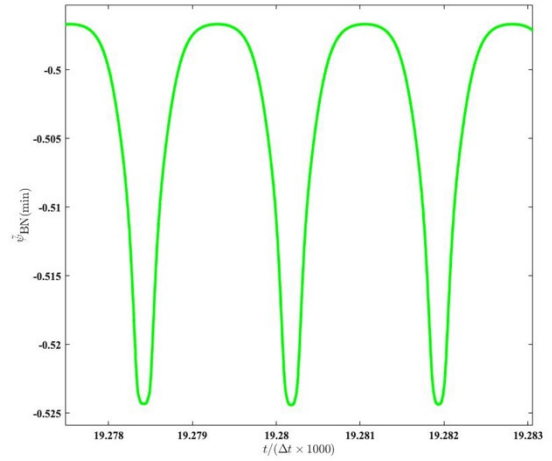

h.

FIG. S.1.(a) h-BN crystal formed at  $10000\Delta t$ . The carbon, boron and nitrogen atoms are represented by blue, red and green colors, respectively, (b) the density map of the h-BN crystal at  $10000\Delta t$  given in Fig. (a), (c) the local particle density for boron,  $\psi_B$  and nitrogen  $\psi_N$  particles, and average particle density,  $\psi_{BN}$  at the growth front. Here,  $Z$  is the distance from the center of the particle, along the horizontal center line of the cluster, (d) the local particle density for carbon,  $\psi_C$  particle, and average particle density of graphene,  $\psi_G$  at the growth front, where  $z$  is the distance from the center of the particle, along the horizontal center line of the cluster, (e) shape of the smoothed density profile,  $\psi_{BN}$  on the front of solid-liquid interface for different values of the hexagonal shape of h-BN having boron atoms at  $10000\Delta t$ , (f) the minimum density,  $\psi_{BN(min)}$  of the liquid phase on front of solid-liquid interface for the boron atoms at  $10000\Delta t$ , (g) shape of the smoothed density profile,  $\psi_{BN}$  on the front of solid-liquid interface for different values of the hexagonal shape of h-BN having nitrogen atoms at  $10000\Delta t$ , and (h) the minimum density,  $\psi_{BN(min)}$  of the liquid phase on front of solid-liquid interface for the nitrogen atoms at  $10000\Delta t$ . Here,  $\tau$  is the dimensionless time, and  $t$  is time step from 9100 to 10000.

## S.2. Example 2

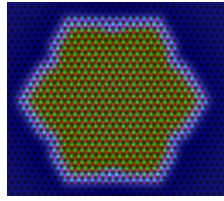

a.

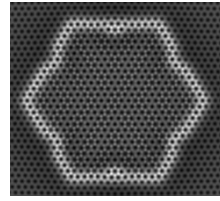

b.

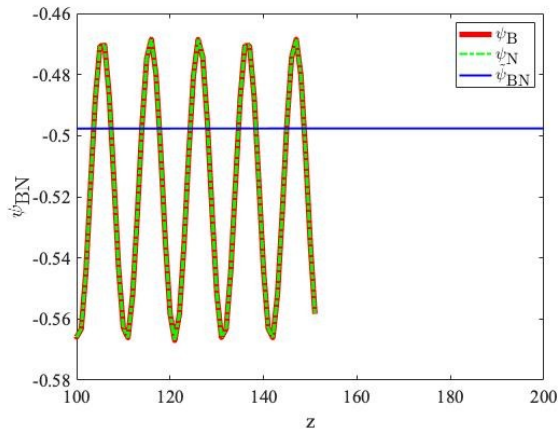

c.

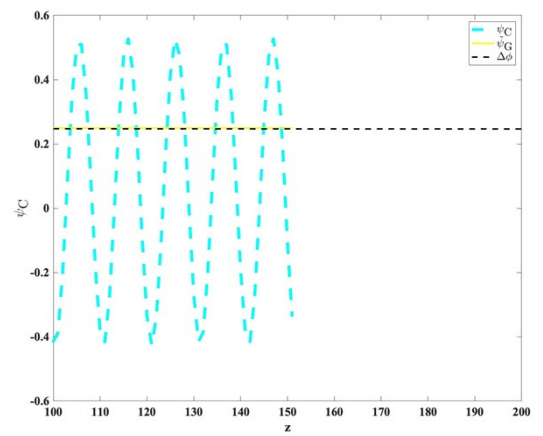

d.

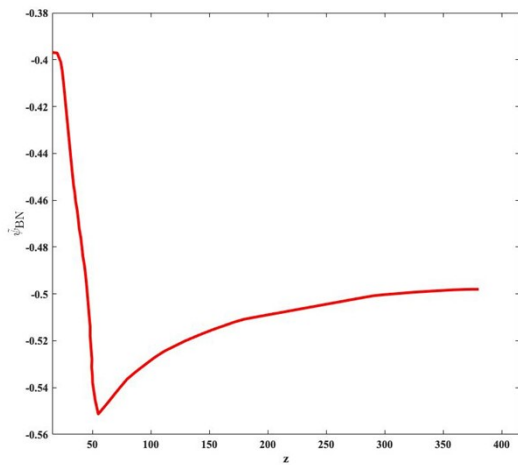

e.

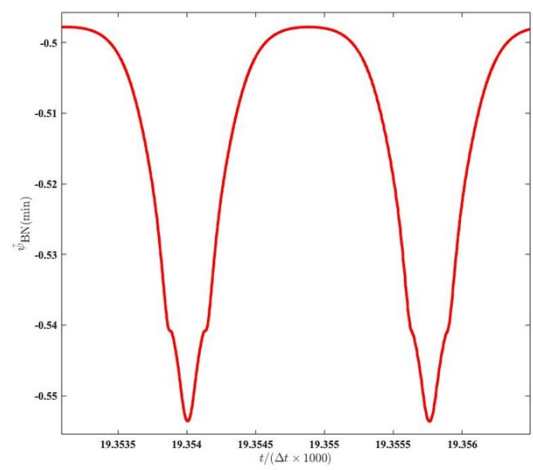

f.

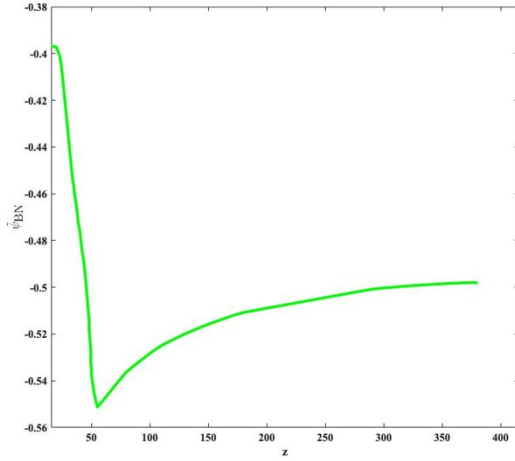

g.

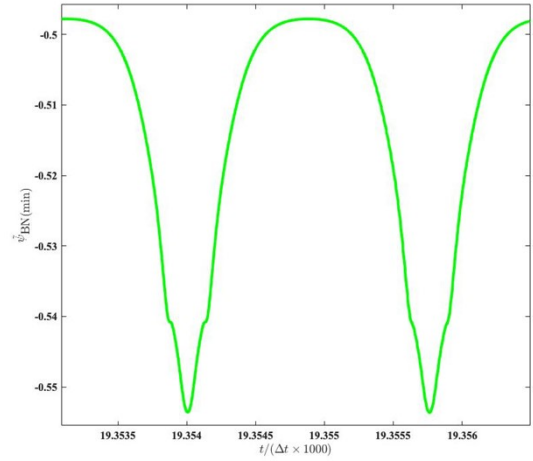

h.

FIG. S.2. (a) h-BN crystal formed at  $10000\Delta t$ , (b) the density map of the h-BN crystal at  $10000\Delta t$  given in Fig. (a), (c) the local particle density for boron,  $\psi_B$  and nitrogen  $\psi_N$  particles, and average particle density,  $\psi_{BN}$  at the growth front. Here,  $z$  is the distance from the center of the particle, along the horizontal center line of the cluster, (d) the local particle density for carbon,  $\psi_C$  particle, and average particle density of graphene,  $\psi_G$  at the growth front, where  $z$  is the distance from the center of the particle, along the horizontal center line of the cluster, (e) shape of the smoothed density profile,  $\psi_{BN}$  on the front of solid-liquid interface for different values of the hexagonal shape of h-BN having boron atoms at  $10000\Delta t$ , (f) the minimum density,  $\psi_{BN(min)}$  of the liquid phase on front of solid-liquid interface for the boron atoms at  $10000\Delta t$ , (g) shape of the smoothed density profile,  $\psi_{BN}$  on the front of solid-liquid interface for different values of the hexagonal shape of h-BN having nitrogen atoms at  $10000\Delta t$ , and (h) the minimum density,  $\psi_{BN(min)}$  of the liquid phase on front of solid-liquid interface for the nitrogen atoms at  $10000\Delta t$ .

### S.3. Example 3

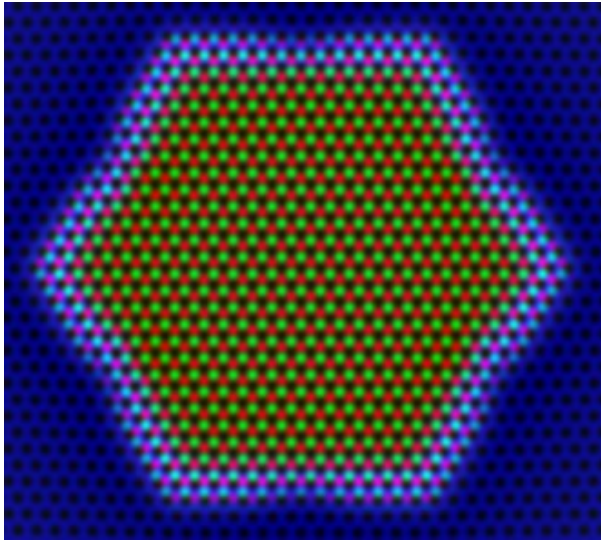

a.

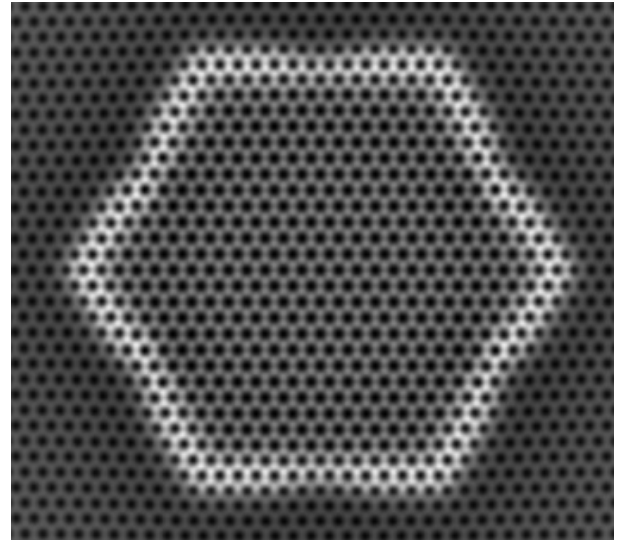

b.

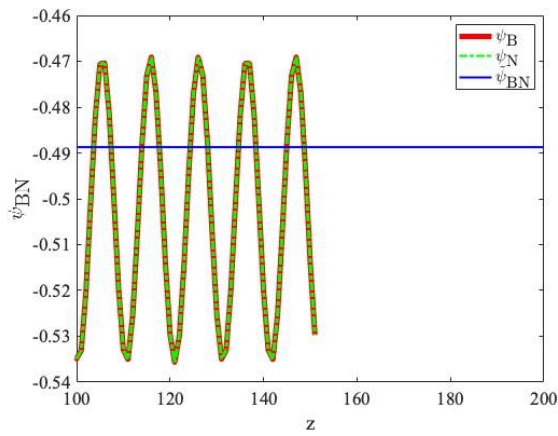

c.

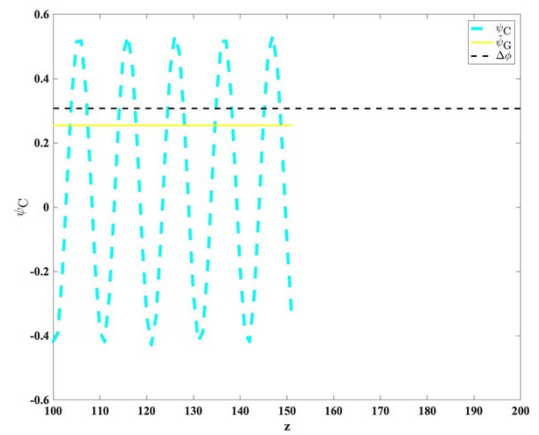

d.

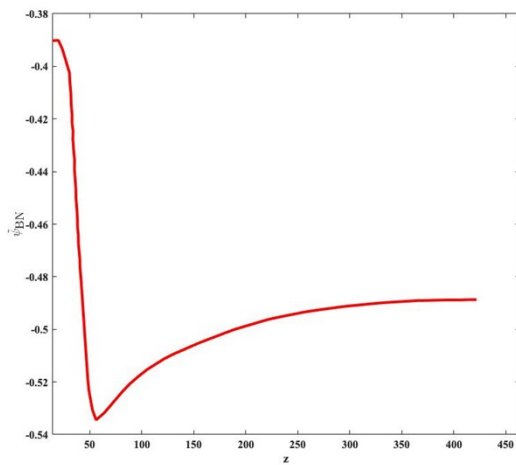

e.

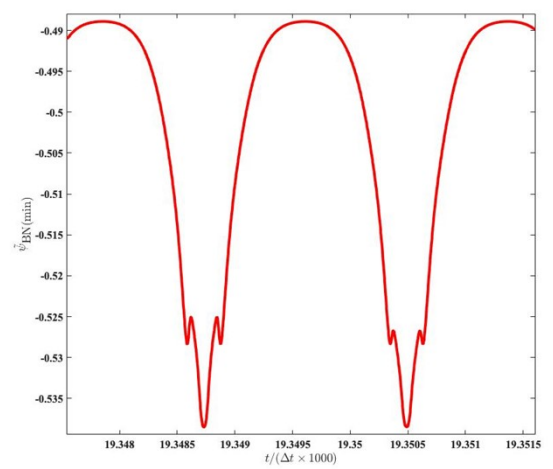

f.

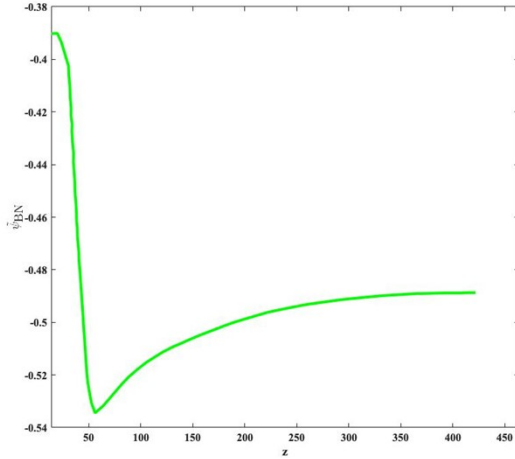

g.

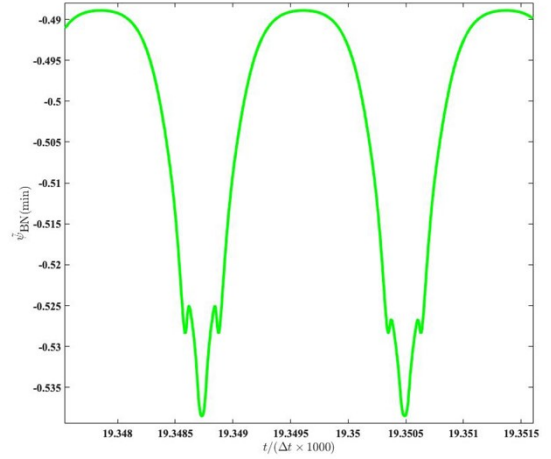

h.

FIG. S.3. (a) h-BN crystal formed at  $10000\Delta t$ , (b) the density map of the h-BN crystal at  $10000\Delta t$  given in Fig. (a), (c) the local particle density for boron,  $\psi_B$  and nitrogen  $\psi_N$  particles, and average particle density,  $\psi_{BN}$  at the growth front. Here,  $z$  is the distance from the center of the particle, along the horizontal center line of the cluster, (d) the local particle density for carbon,  $\psi_C$  particle, and average particle density of graphene,  $\psi_G$  at the growth front, where  $z$  is the distance from the center of the particle, along the horizontal center line of the cluster, (e) shape of the smoothed density profile,  $\psi_{BN}$  on the front of solid-liquid interface for different values of the hexagonal shape of h-BN having boron atoms at  $10000\Delta t$ , (f) the minimum density,  $\psi_{BN(min)}$  of the liquid phase on front of solid-liquid interface for the boron atoms at  $10000\Delta t$ , (g) shape of the smoothed density profile,  $\psi_{BN}$  on the front of solid-liquid interface for different values of the hexagonal shape of h-BN having nitrogen atoms at  $10000\Delta t$ , and (h) the minimum density,  $\psi_{BN(min)}$  of the liquid phase on front of solid-liquid interface for the nitrogen atoms at  $10000\Delta t$ .

#### S.4. Example 4

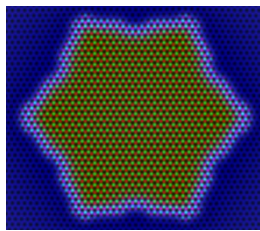

a.

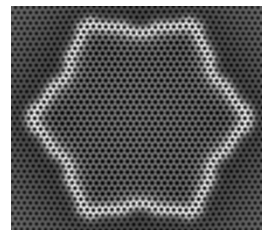

b.

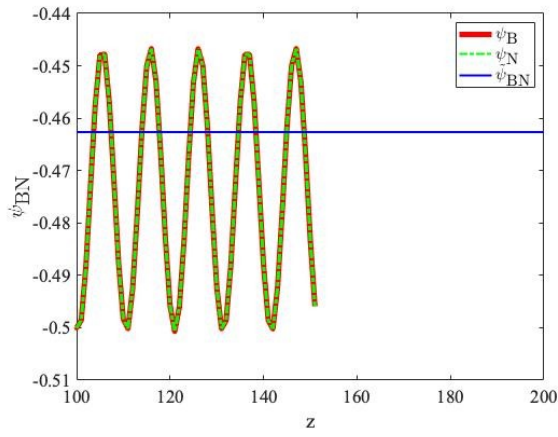

c.

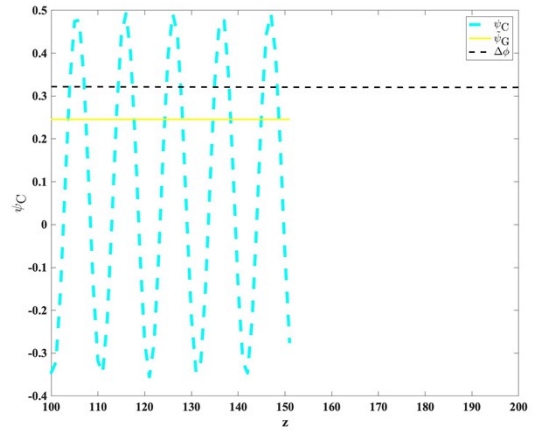

d.

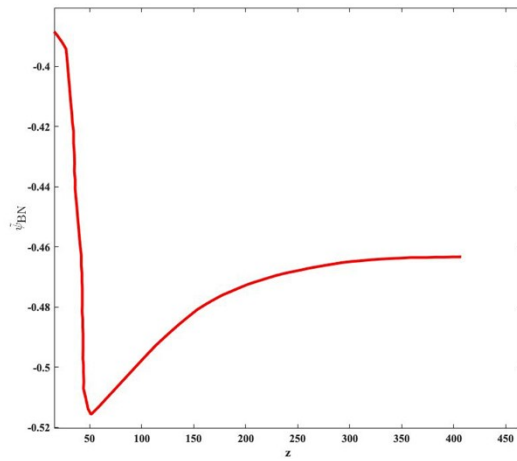

e.

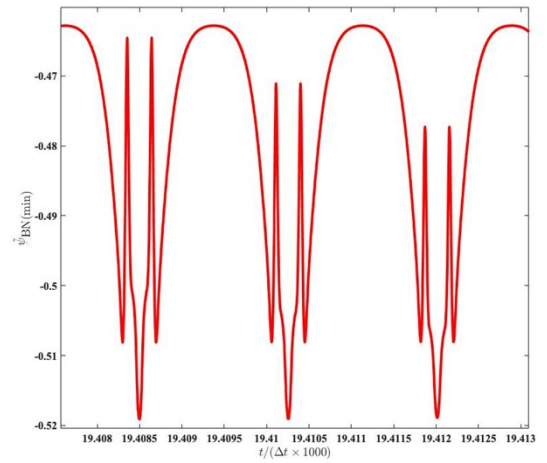

f.

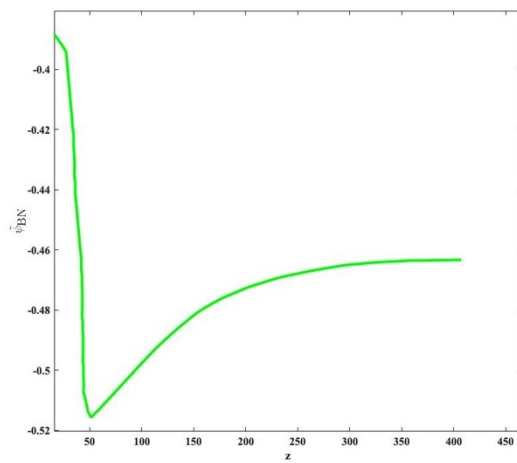

g.

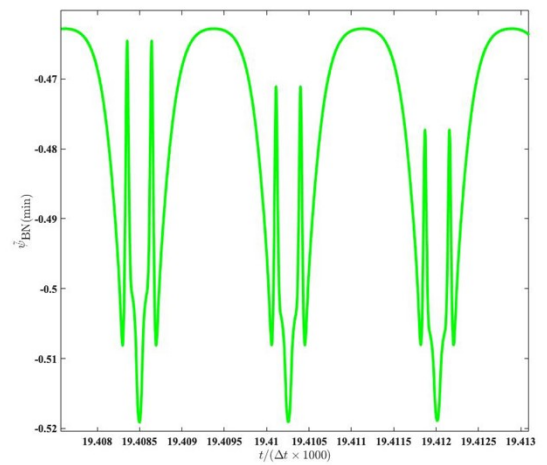

h.

FIG. S.4. (a) h-BN crystal formed at  $10000\Delta t$ , (b) the density map of the h-BN crystal at  $10000\Delta t$  given in Fig. (a), (c) the local particle density for boron,  $\psi_B$  and nitrogen  $\psi_N$  particles, and average particle density,  $\psi_{BN}$  at the growth front. Here,  $z$  is the distance from the center of the particle, along the horizontal center line of the cluster, (d) the local particle density for carbon,  $\psi_C$  particle, and average particle density of graphene,  $\psi_G$  at the growth front, where  $z$  is the distance from the center of the particle, along the horizontal center line of the cluster, (e) shape of the smoothed density profile,  $\psi_{BN}$  on the front of solid-liquid interface for different values of the hexagonal shape of h-BN having boron atoms at  $10000\Delta t$ , (f) the minimum density,  $\psi_{BN(min)}$  of the liquid phase on front of solid-liquid interface for the boron atoms at  $10000\Delta t$ , (g) shape of the smoothed density profile,  $\psi_{BN}$  on the front of solid-liquid interface for different values of the hexagonal shape of h-BN having nitrogen atoms at  $10000\Delta t$ , and (h) the minimum density,  $\psi_{BN(min)}$  of the liquid phase on front of solid-liquid interface for the nitrogen atoms at  $10000\Delta t$ .

### S.5. Example 5

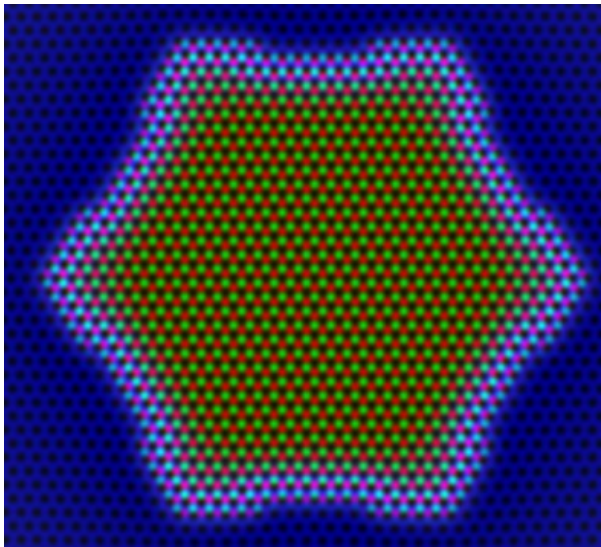

a

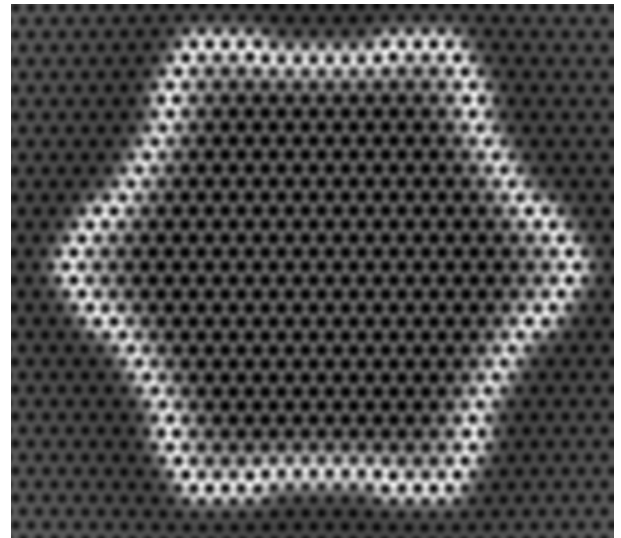

b

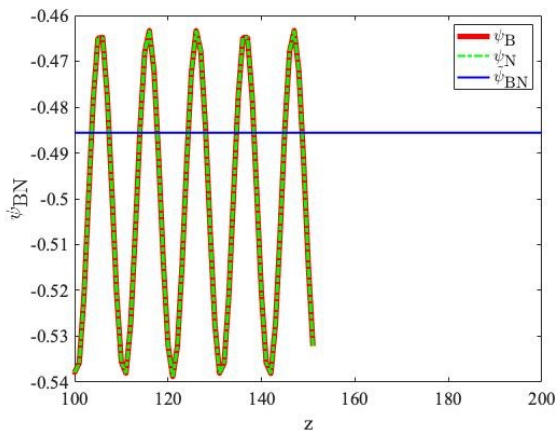

c.

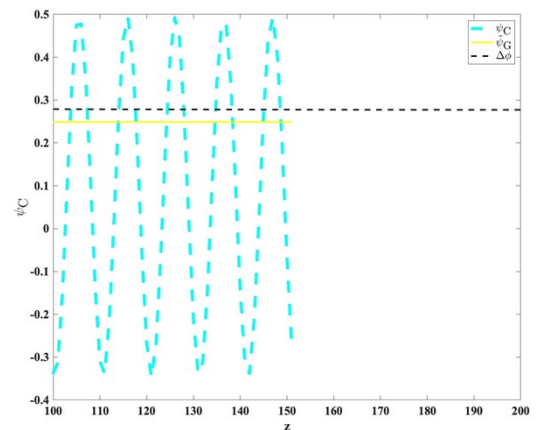

d.



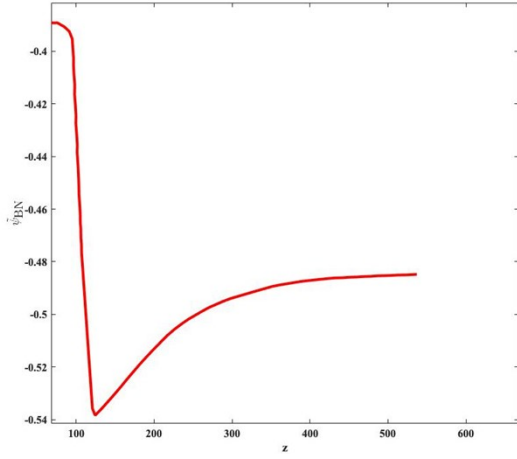

e.

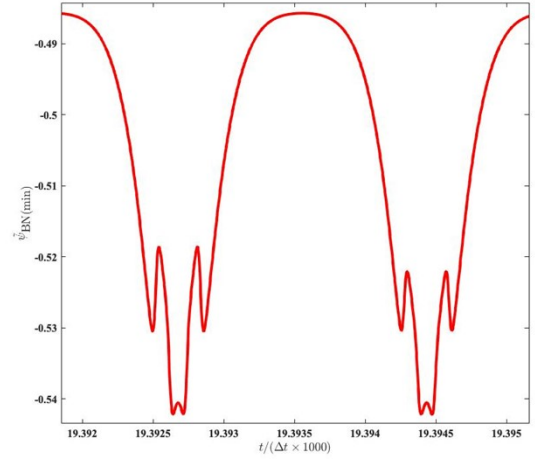

f.

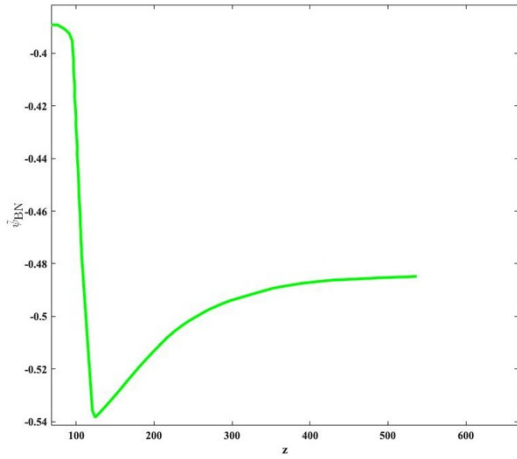

g.

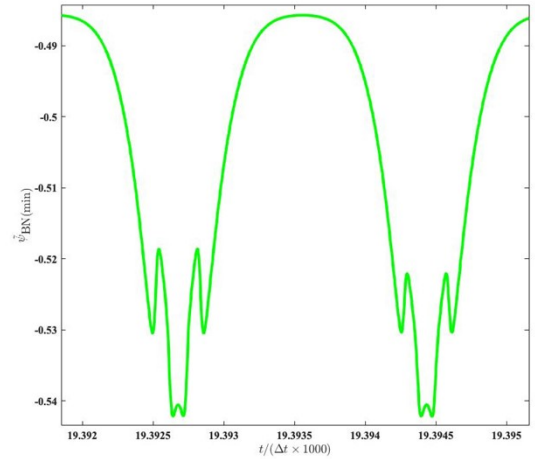

h.

FIG. S.5. (a) h-BN crystal formed at  $10000\Delta t$ , (b) the density map of the h-BN crystal at  $10000\Delta t$  given in Fig. (a), (c) the local particle density for boron,  $\psi_B$  and nitrogen  $\psi_N$  particles, and average particle density,  $\psi_{BN}$  at the growth front. Here,  $z$  is the distance from the center of the particle, along the horizontal center line of the cluster, (d) the local particle density for carbon,  $\psi_C$  particle, and average particle density of graphene,  $\psi_G$  at the growth front, where  $z$  is the distance from the center of the particle, along the horizontal center line of the cluster, (e) shape of the smoothed density profile,  $\psi_{BN}$  on the front of solid-liquid interface for different values of the hexagonal shape of h-BN having boron atoms at  $10000\Delta t$ , (f) the minimum density,  $\psi_{BN(min)}$  of the liquid phase on front of solid-liquid interface for the boron atoms at  $10000\Delta t$ , (g) shape of the smoothed density profile,  $\psi_{BN}$  on the front of solid-liquid interface for different values of the hexagonal shape of h-BN having nitrogen atoms at  $10000\Delta t$ , and (h) the minimum density,  $\psi_{BN(min)}$  of the liquid phase on front of solid-liquid interface for the nitrogen atoms at  $10000\Delta t$ .

## S.6. Example 6

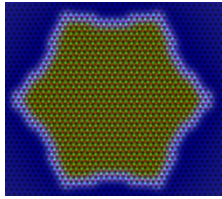

a.

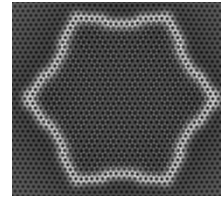

b.

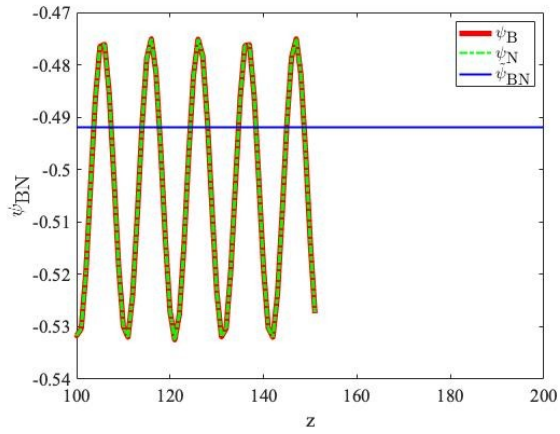

c.

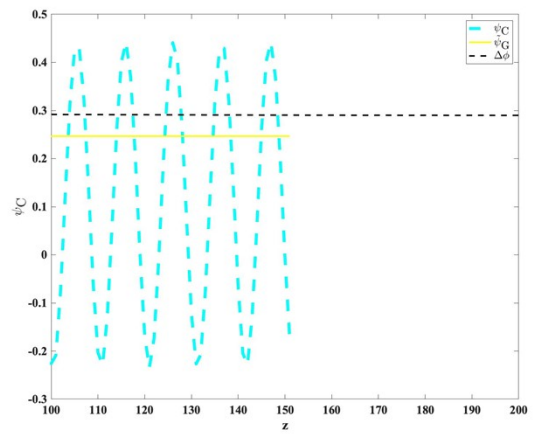

d.

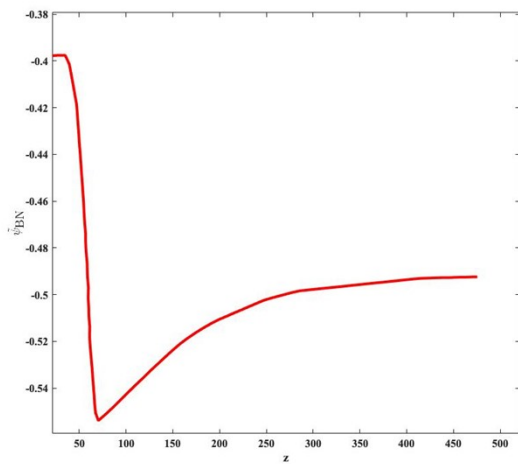

e.

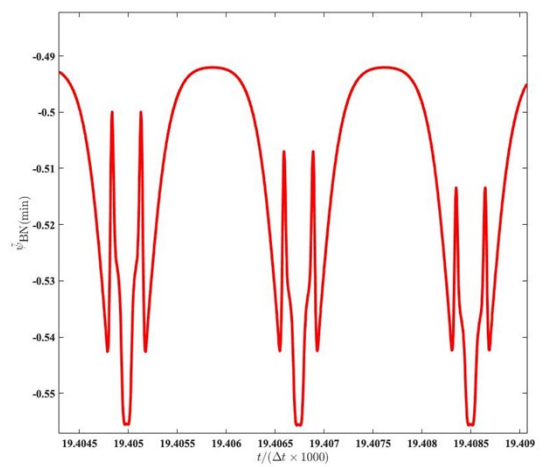

f.

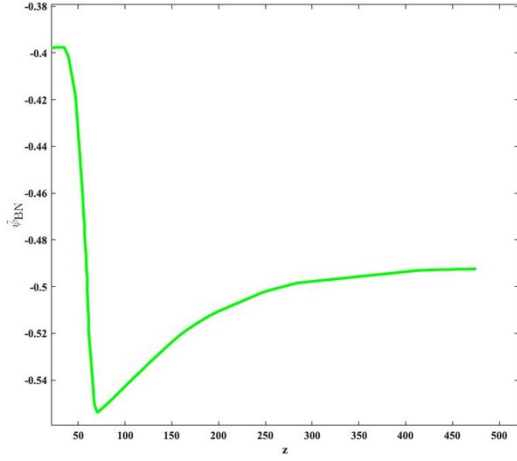

g.

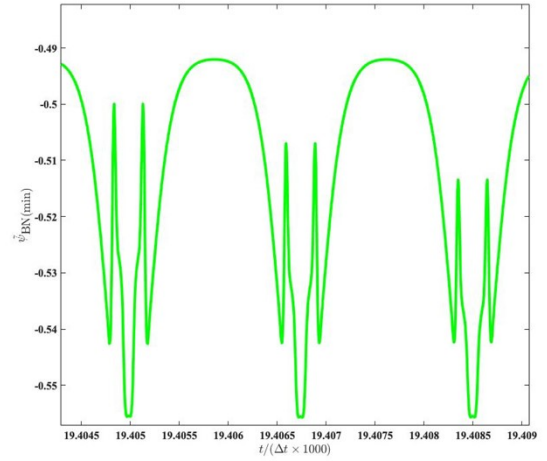

h.

FIG. S.6. (a) h-BN crystal formed at  $10000\Delta t$ , (b) the density map of the h-BN crystal at  $10000\Delta t$  given in Fig. (a), (c) the local particle density for boron,  $\psi_B$  and nitrogen  $\psi_N$  particles, and average particle density,  $\psi_{BN}$  at the growth front. Here,  $z$  is the distance from the center of the particle, along the horizontal center line of the cluster, (d) the local particle density for carbon,  $\psi_C$  particle, and average particle density of graphene,  $\psi_G$  at the growth front, where  $z$  is the distance from the center of the particle, along the horizontal center line of the cluster, (e) shape of the smoothed density profile,  $\psi_{BN}$  on the front of solid-liquid interface for different values of the hexagonal shape of h-BN having boron atoms at  $10000\Delta t$ , (f) the minimum density,  $\psi_{BN(min)}$  of the liquid phase on front of solid-liquid interface for the boron atoms at  $10000\Delta t$ , (g) shape of the smoothed density profile,  $\psi_{BN}$  on the front of solid-liquid interface for different values of the hexagonal shape of h-BN having nitrogen atoms at  $10000\Delta t$ , and (h) the minimum density,  $\psi_{BN(min)}$  of the liquid phase on front of solid-liquid interface for the nitrogen atoms at  $10000\Delta t$ .

### S.7. Example 7

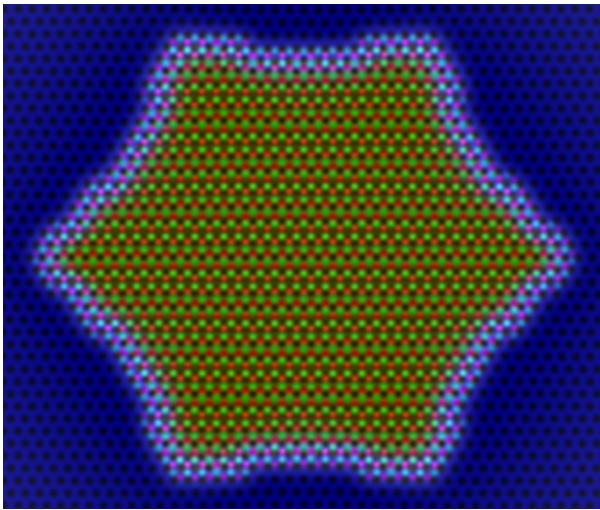

a.

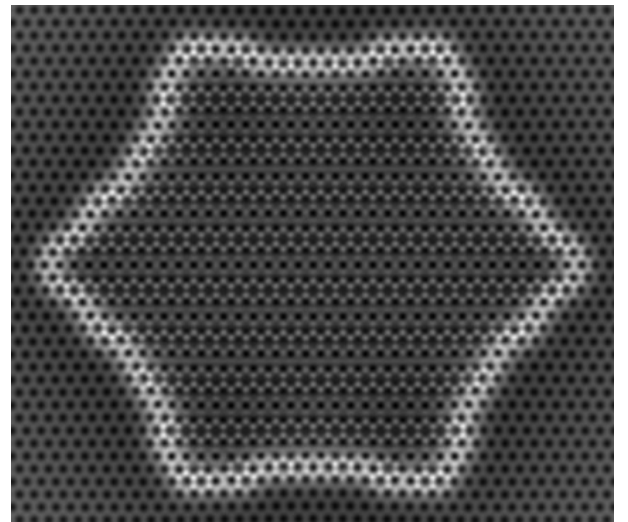

b.

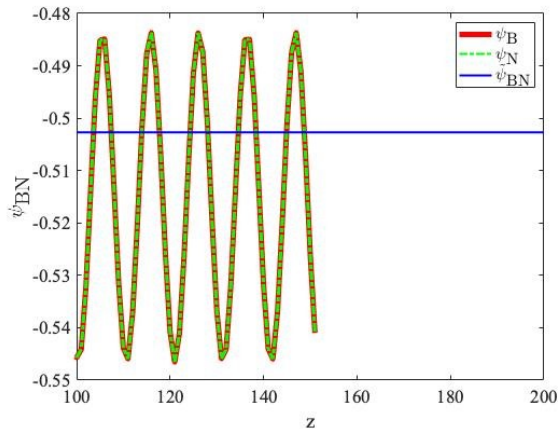

c.

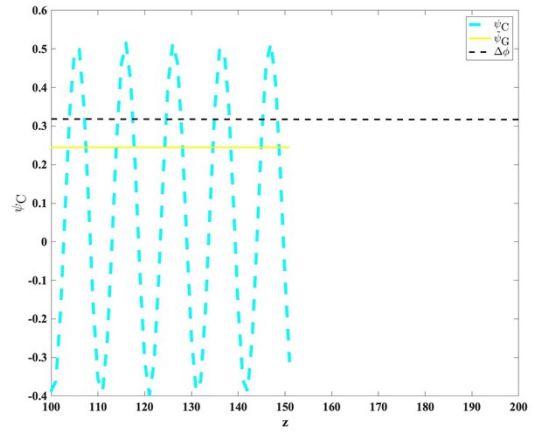

d.

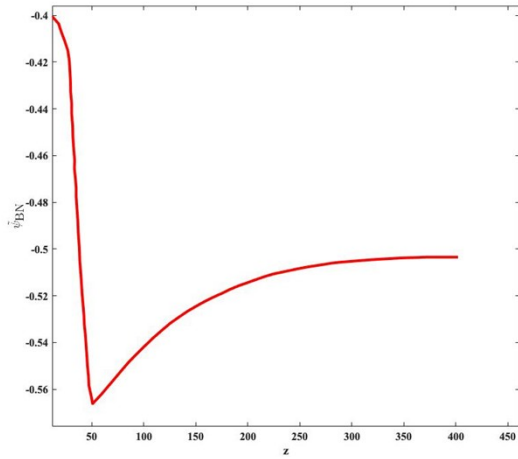

e.

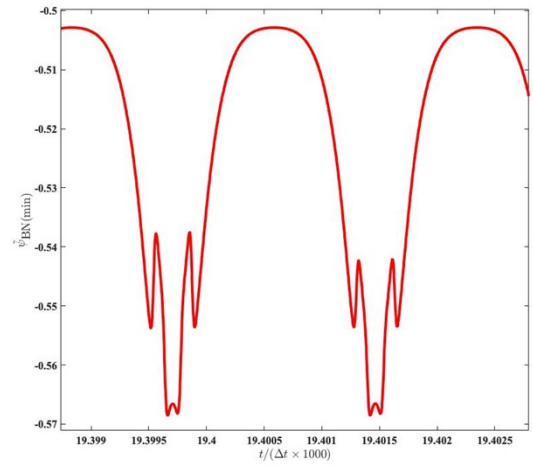

f.

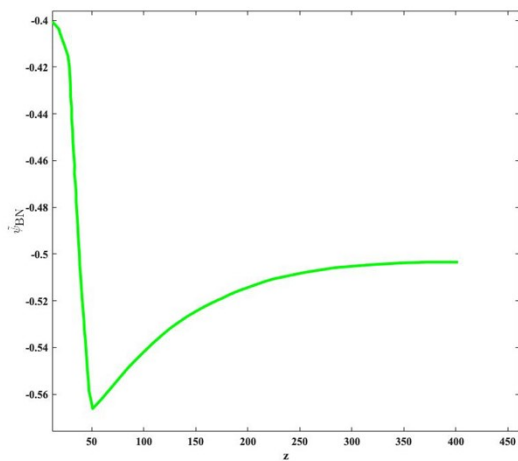

g.

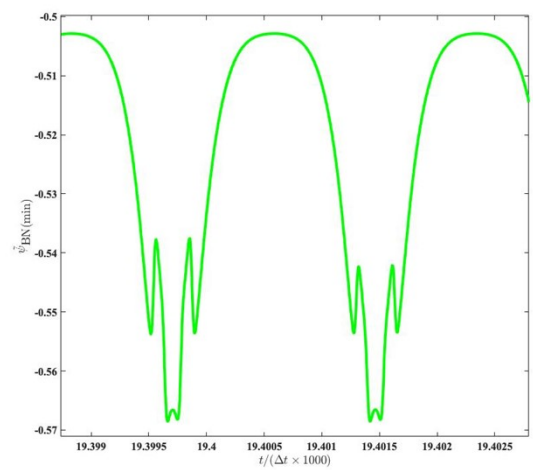

h.

FIG. S.7. (a) h-BN crystal formed at  $10000\Delta t$ , (b) the density map of the h-BN crystal at  $10000\Delta t$  given in Fig. (a), (c) the local particle density for boron,  $\psi_B$  and nitrogen  $\psi_N$  particles, and average particle density,  $\psi_{BN}$  at the growth front. Here,  $z$  is the distance from the center of the particle, along the horizontal center line of the cluster, (d) the local particle density for carbon,  $\psi_C$  particle, and average particle density of graphene,  $\psi_G$  at the growth front, where  $z$  is the distance from the center of the particle, along the horizontal center line of the cluster, (e) shape of the smoothed density profile,  $\psi_{BN}$  on the front of solid-liquid interface for different values of the hexagonal shape of h-BN having boron atoms at  $10000\Delta t$ , (f) the minimum density,  $\psi_{BN(min)}$  of the liquid phase on front of solid-liquid interface for the boron atoms at  $10000\Delta t$ , (g) shape of the smoothed density profile,  $\psi_{BN}$  on the front of solid-liquid interface for different values of the hexagonal shape of h-BN having nitrogen atoms at  $10000\Delta t$ , and (h) the minimum density,  $\psi_{BN(min)}$  of the liquid phase on front of solid-liquid interface for the nitrogen atoms at  $10000\Delta t$ .

### S.8. Example 8

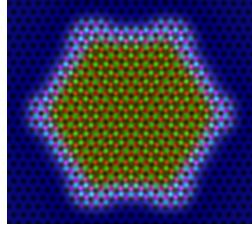

a.

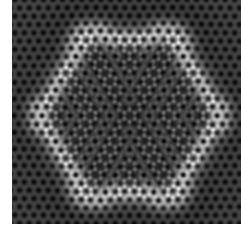

b.

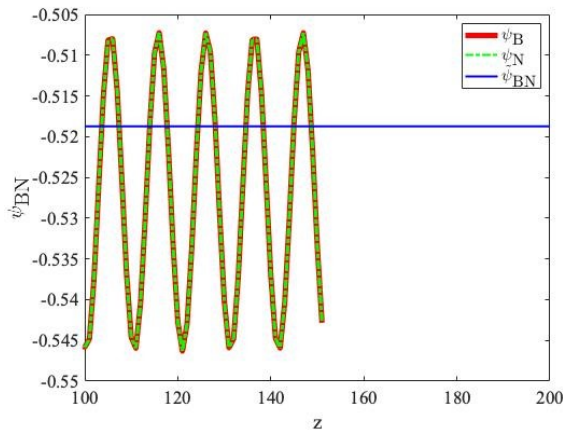

c.

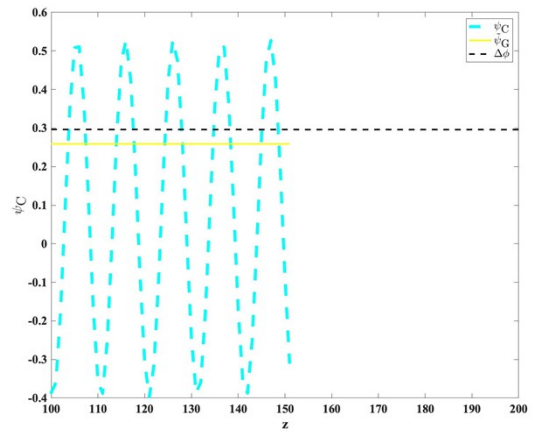

d.

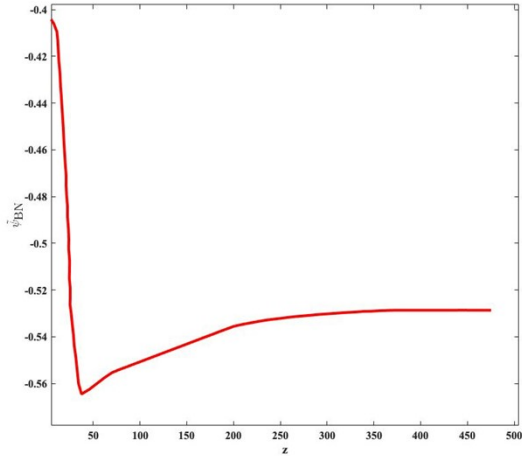

e.

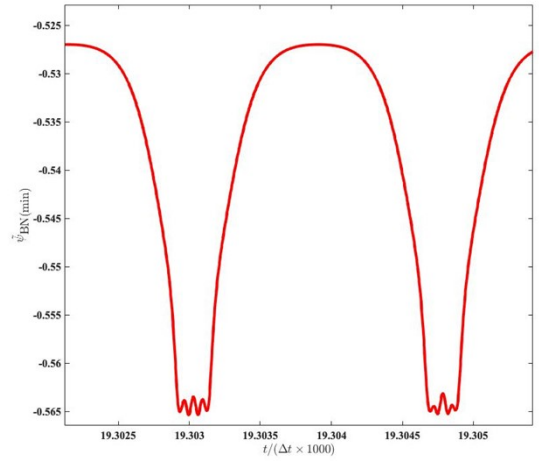

f.

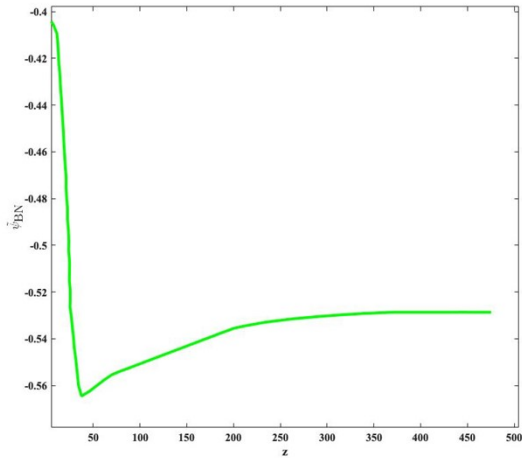

g.

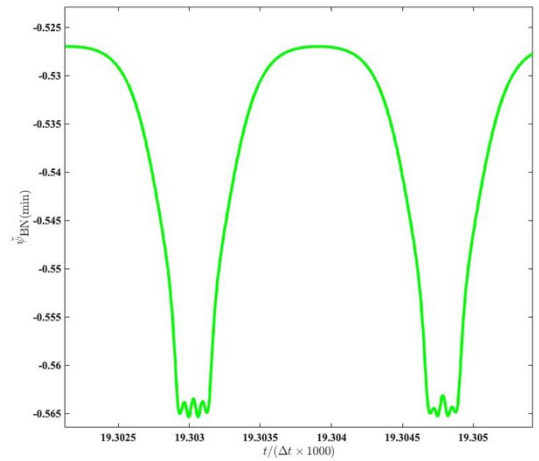

h.

FIG. S.8. (a) h-BN crystal formed at  $10000\Delta t$ , (b) the density map of the h-BN crystal at  $10000\Delta t$  given in Fig. (a), (c) the local particle density for boron,  $\psi_B$  and nitrogen  $\psi_N$  particles, and average particle density,  $\psi_{BN}$  at the growth front. Here,  $z$  is the distance from the center of the particle, along the horizontal center line of the cluster, (d) the local particle density for carbon,  $\psi_C$  particle, and average particle density of graphene,  $\psi_G$  at the growth front, where  $z$  is the distance from the center of the particle, along the horizontal center line of the cluster, (e) shape of the smoothed density profile,  $\psi_{BN}$  on the front of solid-liquid interface for different values of the hexagonal shape of h-BN having boron atoms at  $10000\Delta t$ , (f) the minimum density,  $\psi_{BN(min)}$  of the liquid phase on front of solid-liquid interface for the boron atoms at  $10000\Delta t$ , (g) shape of the smoothed density profile,  $\psi_{BN}$  on the front of solid-liquid interface for different values of the hexagonal shape of h-BN having nitrogen atoms at  $10000\Delta t$ , and (h) the minimum density,  $\psi_{BN(min)}$  of the liquid phase on front of solid-liquid interface for the nitrogen atoms at  $10000\Delta t$ .

## S.9. Example 9

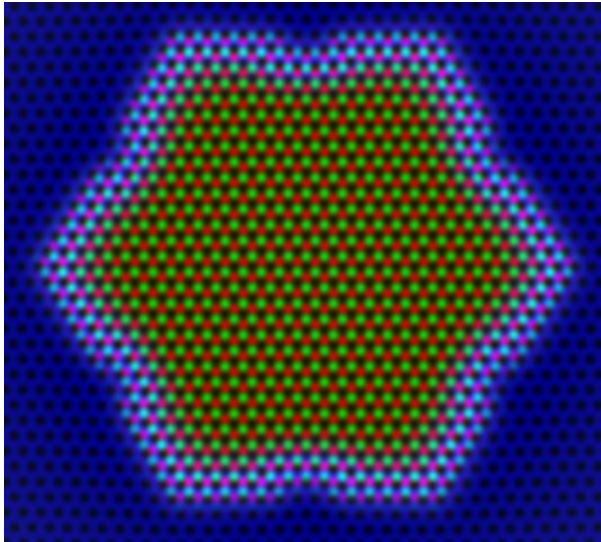

a.

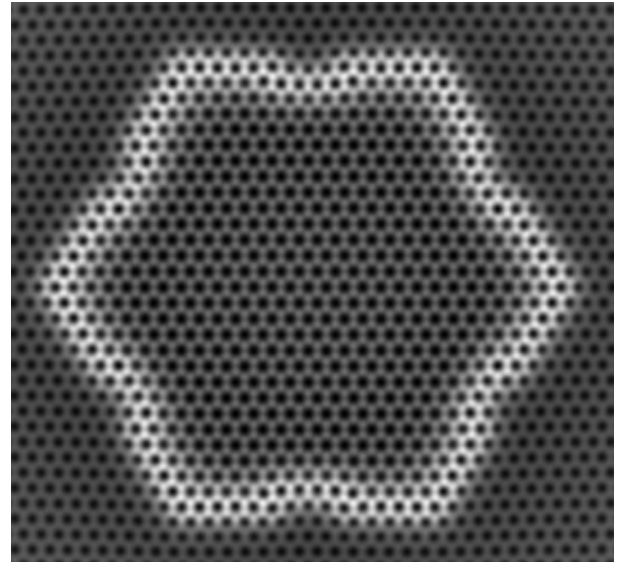

b.

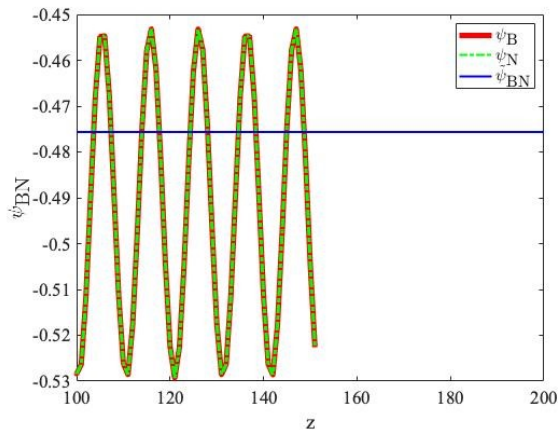

c.

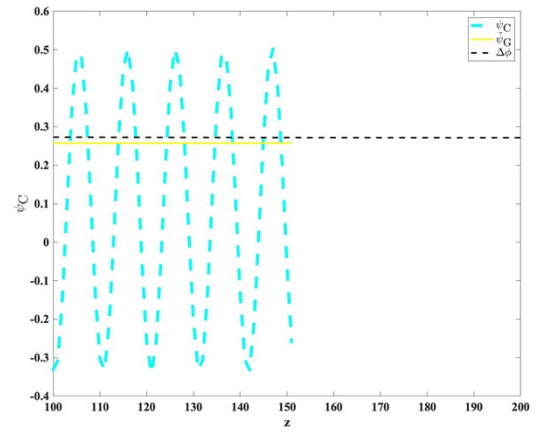

d.

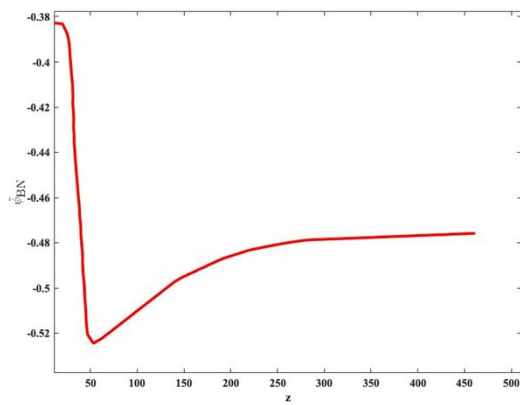

e.

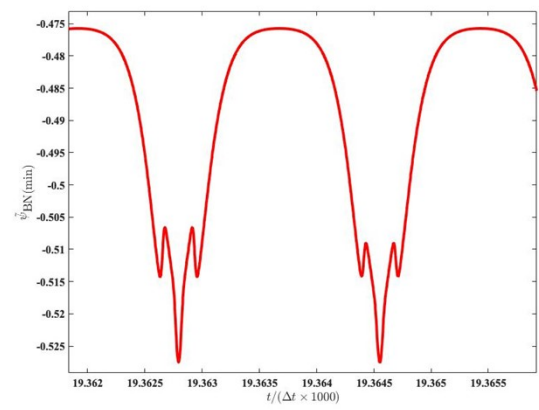

f.

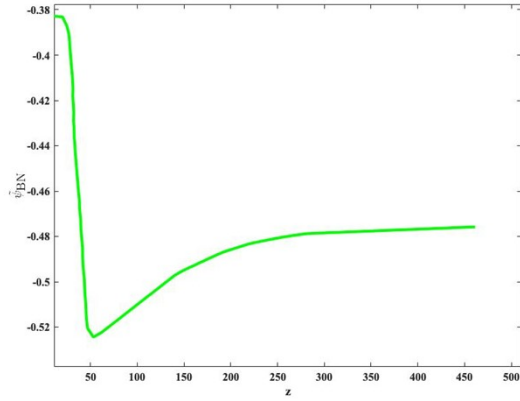

g.

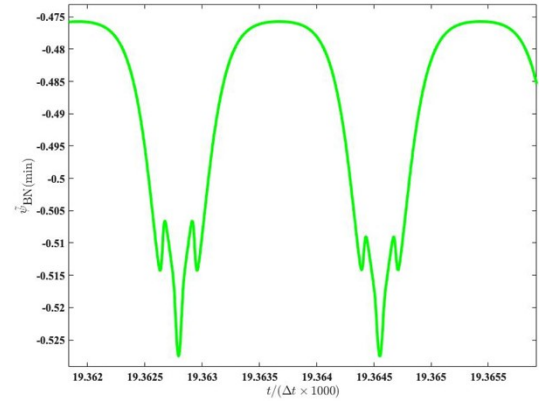

h.

FIG. S. 9. (a) h-BN crystal formed at  $10000\Delta t$ , (b) the density map of the h-BN crystal at  $10000\Delta t$  given in Fig. (a), (c) the local particle density for boron,  $\psi_B$  and nitrogen  $\psi_N$  particles, and average particle density,  $\psi_{BN}$  at the growth front. Here,  $z$  is the distance from the center of the particle, along the horizontal center line of the cluster, (d) the local particle density for carbon,  $\psi_C$  particle, and average particle density of graphene,  $\psi_G$  at the growth front, where  $z$  is the distance from the center of the particle, along the horizontal center line of the cluster, (e) shape of the smoothed density profile,  $\psi_{BN}$  on the front of solid-liquid interface for different values of the hexagonal shape of h-BN having boron atoms at  $10000\Delta t$ , (f) the minimum density,  $\psi_{BN}^{(min)}$  of the liquid phase on front of solid-liquid interface for the boron atoms at  $10000\Delta t$ , (g) shape of the smoothed density profile,  $\psi_{BN}$  on the front of solid-liquid interface for different values of the hexagonal shape of h-BN having nitrogen atoms at  $10000\Delta t$ , and (h) the minimum density,  $\psi_{BN}^{(min)}$  of the liquid phase on front of solid-liquid interface for the nitrogen atoms at  $10000\Delta t$ .

### S10. Example 10

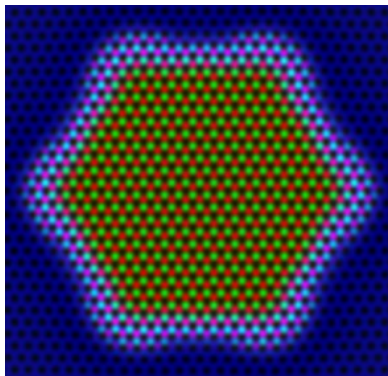

a.

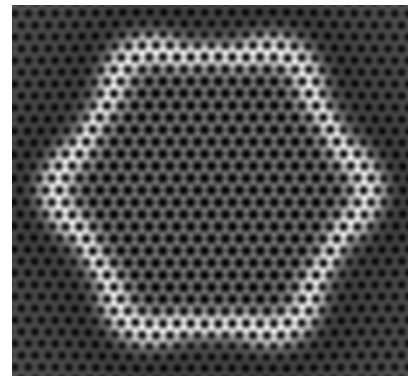

b.



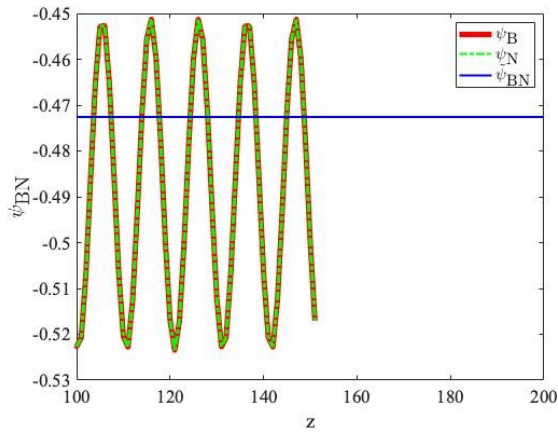

c.

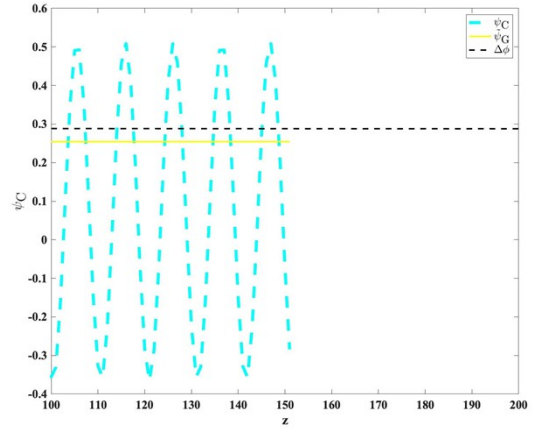

d.

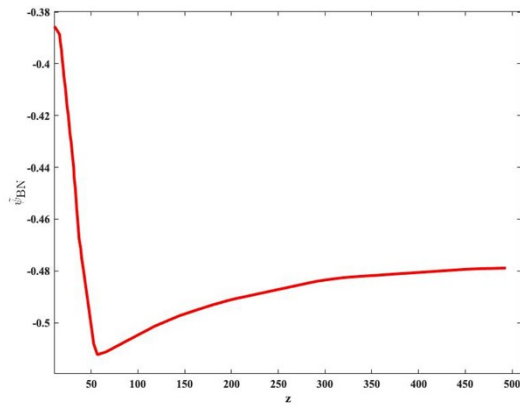

e.

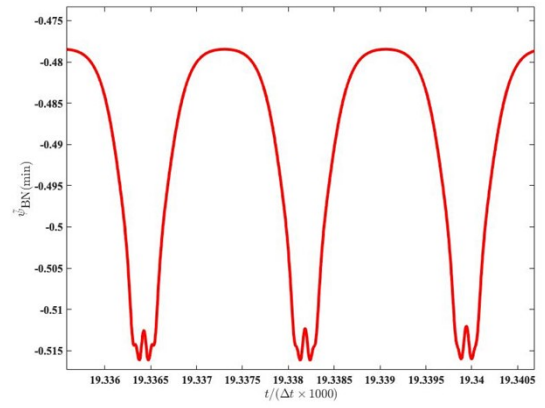

f.

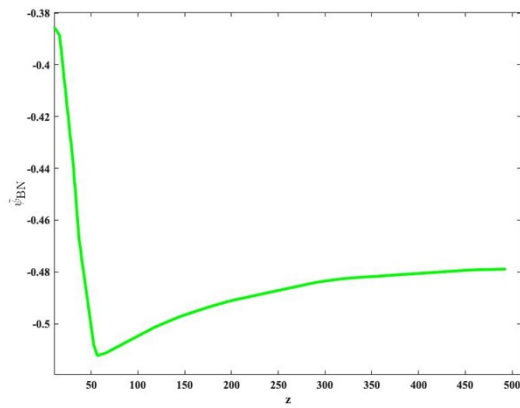

g.

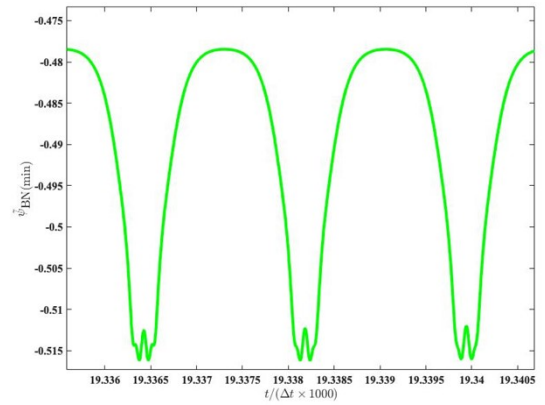

h.

FIG. S. 10. (a) h-BN crystal formed at  $10000\Delta t$ , (b) the density map of the h-BN crystal at  $10000\Delta t$  given in Fig. (a), (c) the local particle density for boron,  $\psi_B$  and nitrogen  $\psi_N$  particles, and average particle density,  $\psi_{BN}$  at the growth front. Here,  $z$  is the distance from the center of the particle, along the horizontal center line of the cluster, (d) the local particle density for carbon,  $\psi_C$  particle, and average particle density of graphene,  $\psi_G$  at the growth front, where  $z$  is the distance from the center of the particle, along the horizontal center line of the cluster, (e) shape of the smoothed density profile,  $\psi_{BN}$  on the front of solid-liquid interface for different values of the hexagonal shape of h-BN having boron atoms at  $10000\Delta t$ , (f) the minimum density,  $\psi_{BN(min)}$  of the liquid phase on front of solid-liquid interface for the boron atoms at  $10000\Delta t$ , (g) shape of the smoothed density profile,  $\psi_{BN}$  on the front of solid-liquid interface for different values of the hexagonal shape of h-BN having nitrogen atoms at  $10000\Delta t$ , and (h) the minimum density,  $\psi_{BN(min)}$  of the liquid phase on front of solid-liquid interface for the nitrogen atoms at  $10000\Delta t$ .

### S.11. Example 11

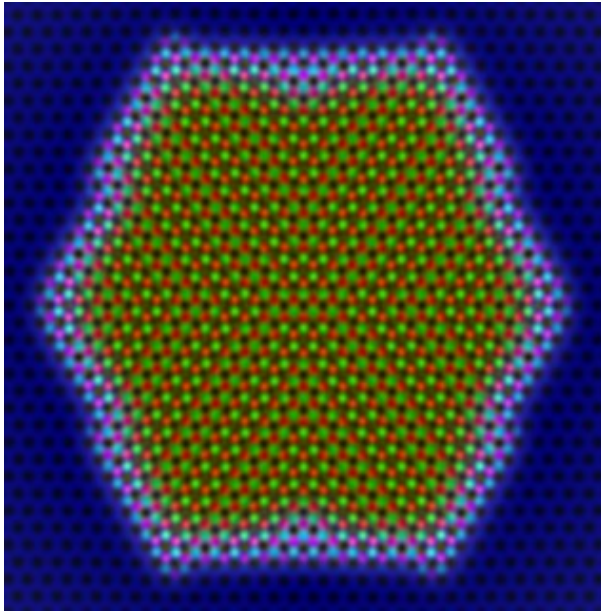

a.

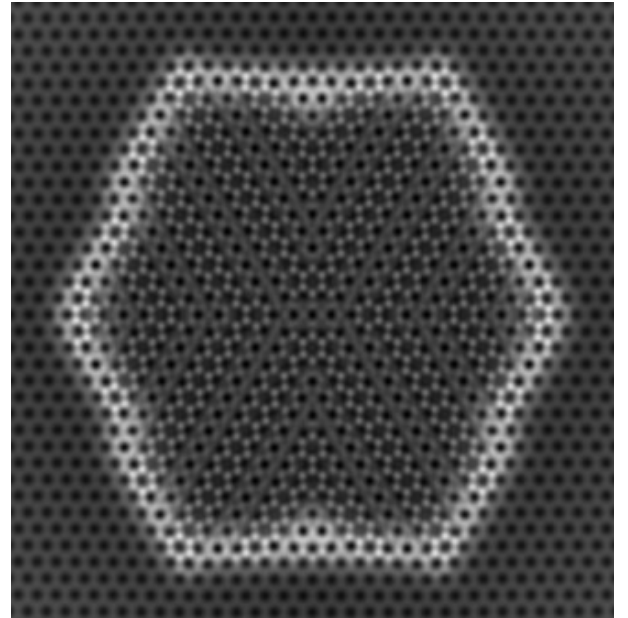

b.

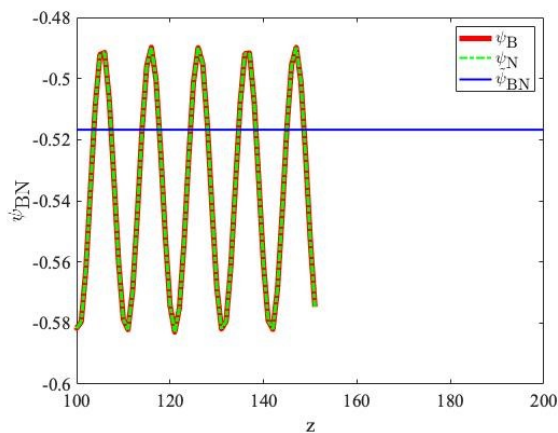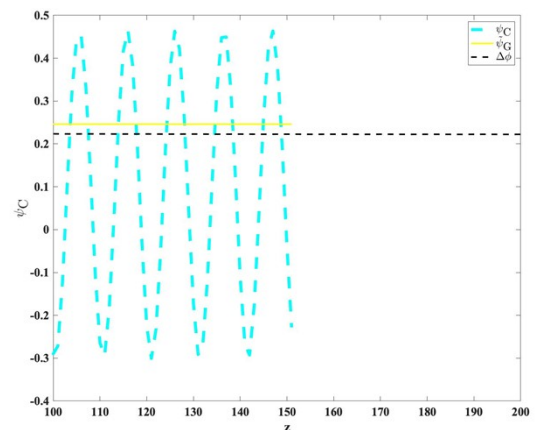

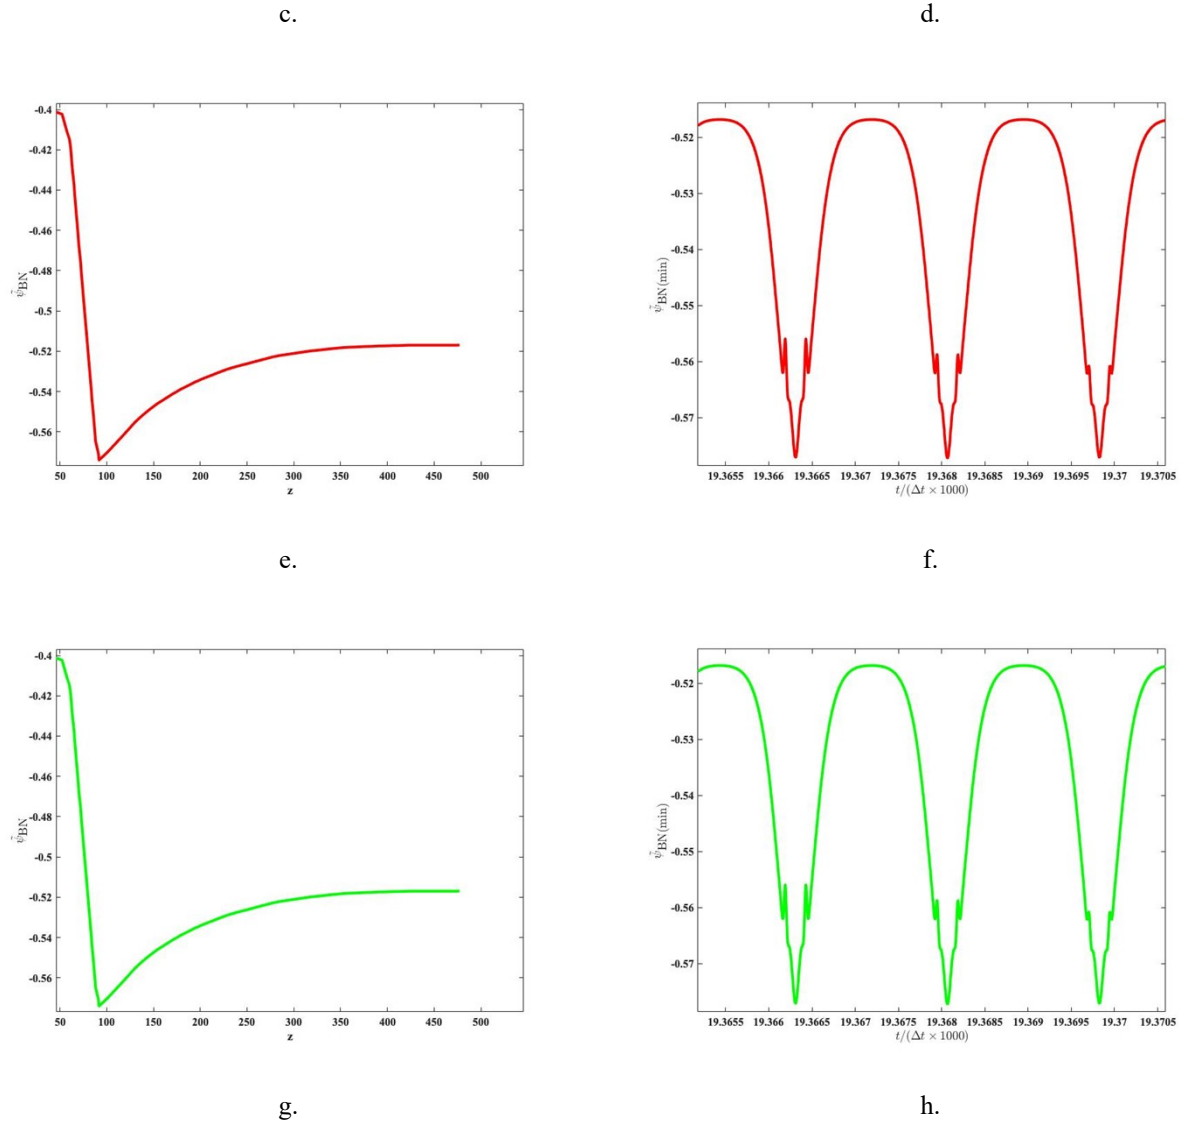

FIG. S.11. (a) h-BN crystal formed at  $10000\Delta t$ , (b) the density map of the h-BN crystal at  $10000\Delta t$  given in Fig. (a), (c) the local particle density for boron,  $\psi_B$  and nitrogen  $\psi_N$  particles, and average particle density,  $\psi_{BN}$  at the growth front. Here,  $z$  is the distance from the center of the particle, along the horizontal center line of the cluster, (d) the local particle density for carbon,  $\psi_C$  particle, and average particle density of graphene,  $\psi_G$  at the growth front, where  $z$  is the distance from the center of the particle, along the horizontal center line of the cluster, (e) shape of the smoothed density profile,  $\psi_{BN}$  on the front of solid-liquid interface for different values of the hexagonal shape of h-BN having boron atoms at  $10000\Delta t$ , (f) the minimum density,  $\psi_{BN(min)}$  of the liquid phase on front of solid-liquid interface for the boron atoms at  $10000\Delta t$ , (g) shape of the smoothed density profile,  $\psi_{BN}$  on the front of solid-liquid interface for different values of the hexagonal shape of h-BN having nitrogen atoms at  $10000\Delta t$ , and (h) the minimum density,  $\psi_{BN(min)}$  of the liquid phase on front of solid-liquid interface for the nitrogen atoms at  $10000\Delta t$ .

## S.12. Example 12

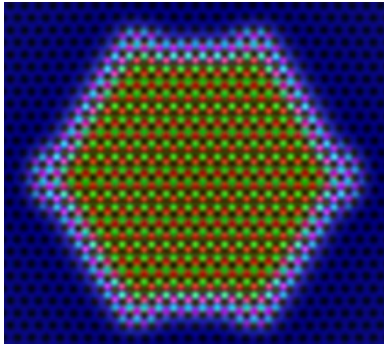

a.

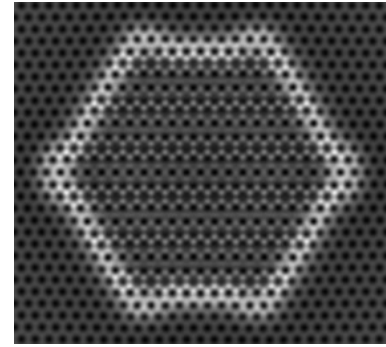

b.

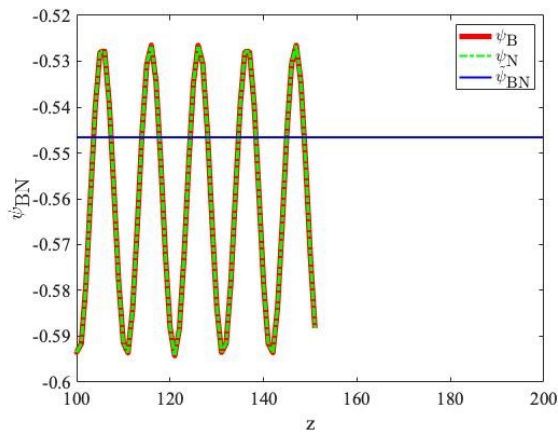

c.

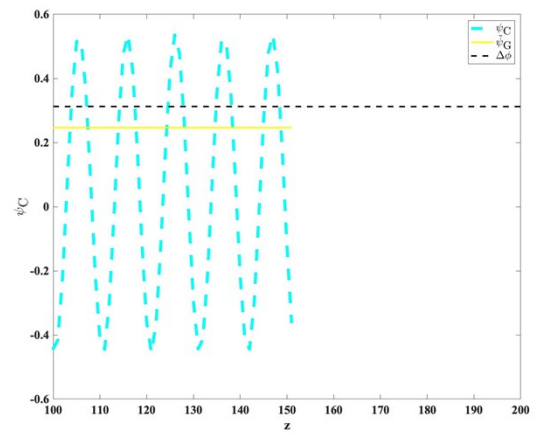

d.

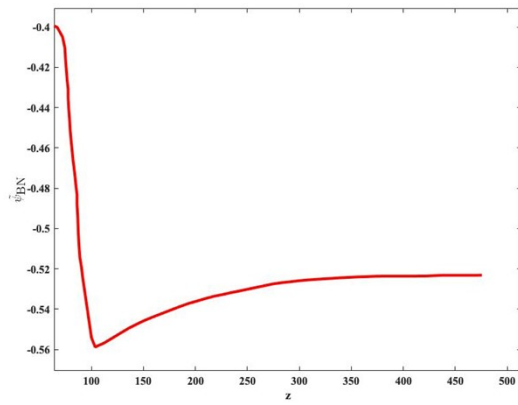

e.

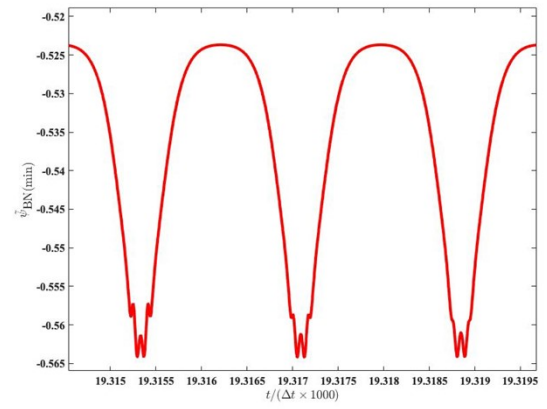

f.

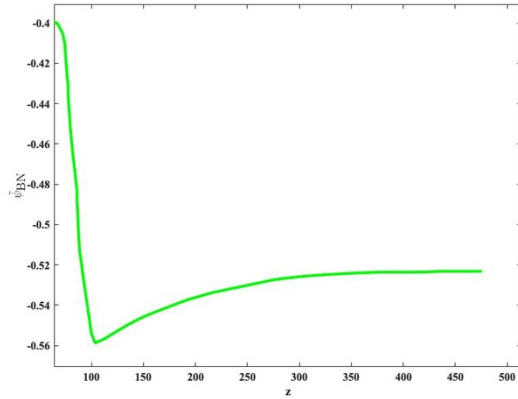

g.

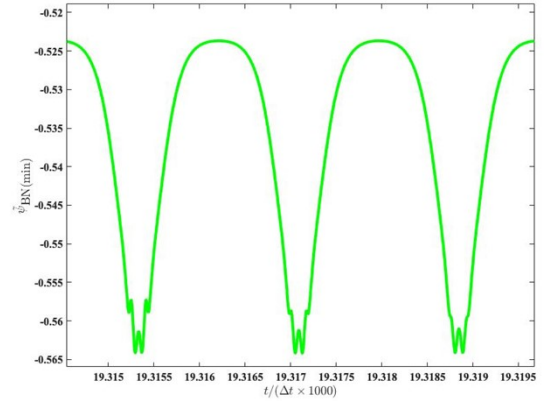

h.

FIG. S. 12. (a) h-BN crystal formed at  $10000\Delta t$ , (b) the density map of the h-BN crystal at  $10000\Delta t$  given in Fig. (a), (c) the local particle density for boron,  $\psi_B$  and nitrogen  $\psi_N$  particles, and average particle density,  $\psi_{BN}$  at the growth front. Here,  $z$  is the distance from the center of the particle, along the horizontal center line of the cluster, (d) the local particle density for carbon,  $\psi_C$  particle, and average particle density of graphene,  $\psi_G$  at the growth front, where  $z$  is the distance from the center of the particle, along the horizontal center line of the cluster, (e) shape of the smoothed density profile,  $\psi_{BN}$  on the front of solid-liquid interface for different values of the hexagonal shape of h-BN having boron atoms at  $10000\Delta t$ , (f) the minimum density,  $\psi_{BN(min)}$  of the liquid phase on front of solid-liquid interface for the boron atoms at  $10000\Delta t$ , (g) shape of the smoothed density profile,  $\psi_{BN}$  on the front of solid-liquid interface for different values of the hexagonal shape of h-BN having nitrogen atoms at  $10000\Delta t$ , and (h) the minimum density,  $\psi_{BN(min)}$  of the liquid phase on front of solid-liquid interface for the nitrogen atoms at  $10000\Delta t$ .

### S.13. Example 13

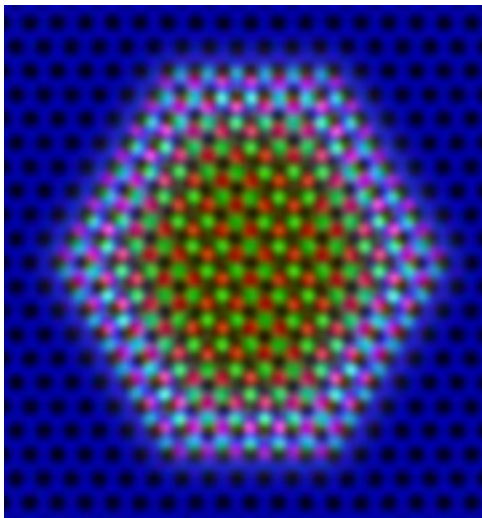

a.

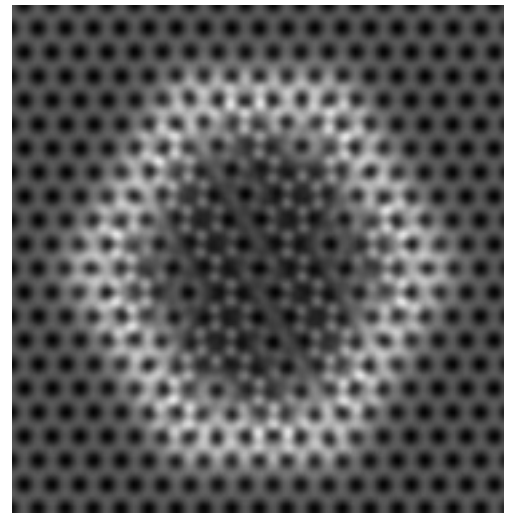

b.

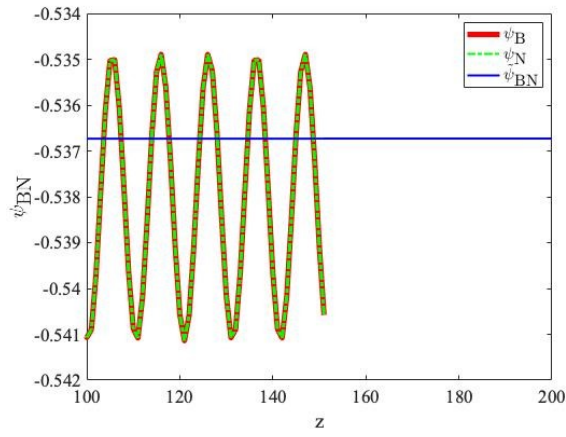

c.

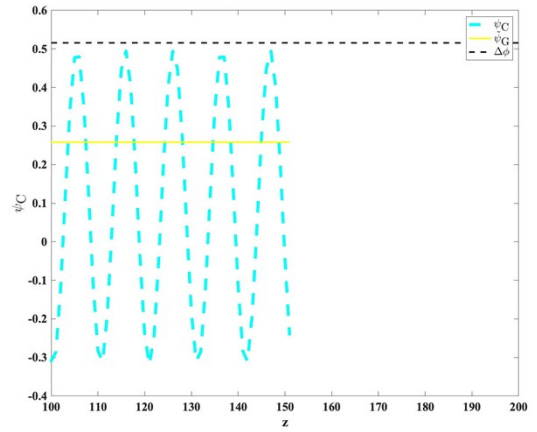

d.

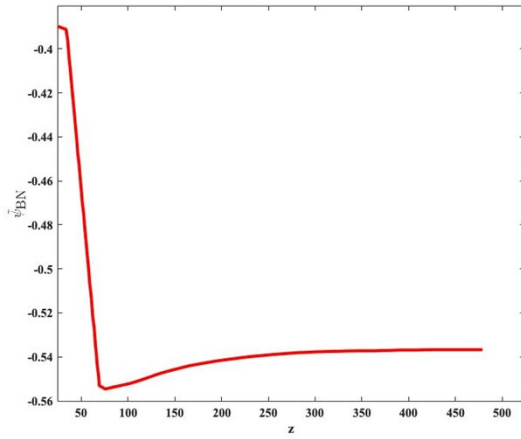

e.

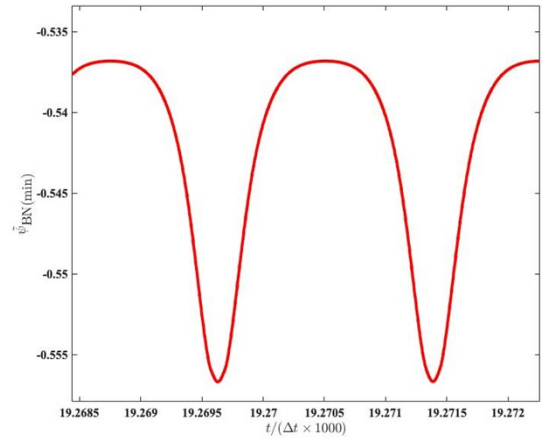

f.

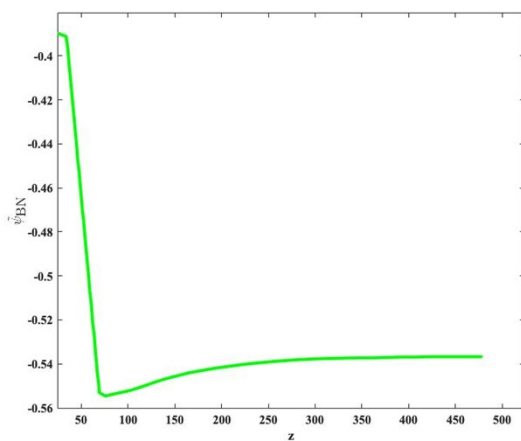

g.

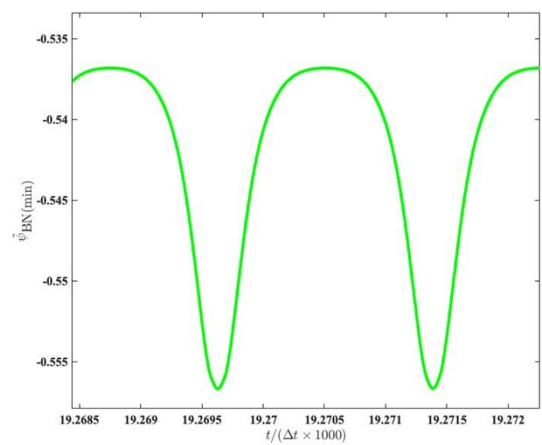

h.

FIG. S. 13. (a) h-BN crystal formed at  $10000\Delta t$ , (b) the density map of the h-BN crystal at  $10000\Delta t$  given in Fig. (a), (c) the local particle density for boron,  $\psi_B$  and nitrogen  $\psi_N$  particles, and average particle density,  $\psi_{BN}$  at the growth front. Here,  $z$  is the distance from the center of the particle, along the horizontal center line of the cluster, (d) the local particle density for carbon,  $\psi_C$  particle, and average particle density of graphene,  $\psi_G$  at the growth front, where  $z$  is the distance from the center of the particle, along the horizontal center line of the cluster, (e) shape of the smoothed density profile,  $\psi_{BN}$  on the front of solid-liquid interface for different values of the hexagonal shape of h-BN having boron atoms at  $10000\Delta t$ , (f) the minimum density,  $\psi_{BN(min)}$  of the liquid phase on front of solid-liquid interface for the boron atoms at  $10000\Delta t$ , (g) shape of the smoothed density profile,  $\psi_{BN}$  on the front of solid-liquid interface for different values of the hexagonal shape of h-BN having nitrogen atoms at  $10000\Delta t$ , and (h) the minimum density,  $\psi_{BN(min)}$  of the liquid phase on front of solid-liquid interface for the nitrogen atoms at  $10000\Delta t$ .

## 2. Multilayer jagged triangular crystals

Truncated triangular h-BN crystal, with multiple layers.

### S.2.1. Example 1 with boron atoms on long edges and nitrogen atoms on short edges

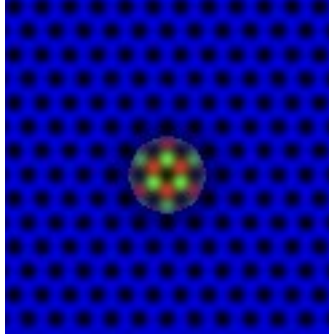

a.

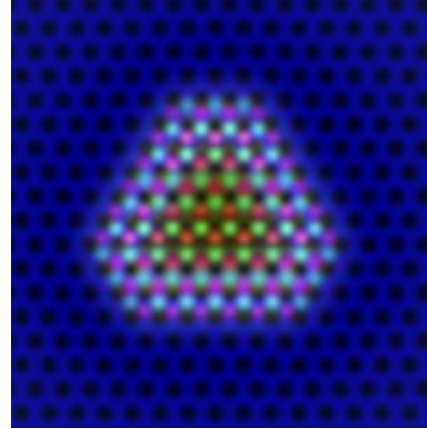

b.

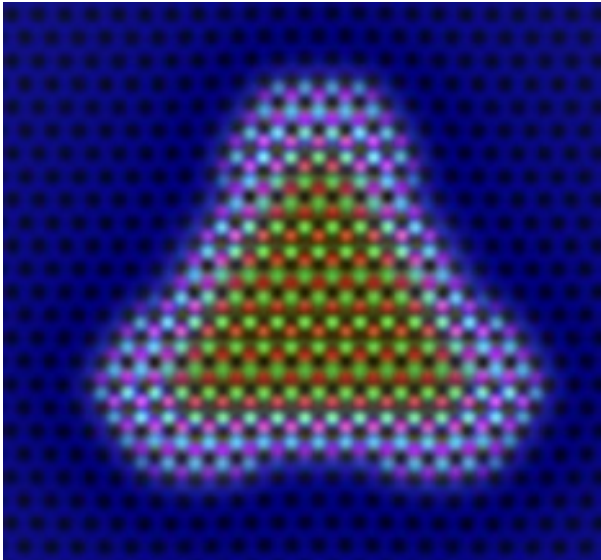

c.

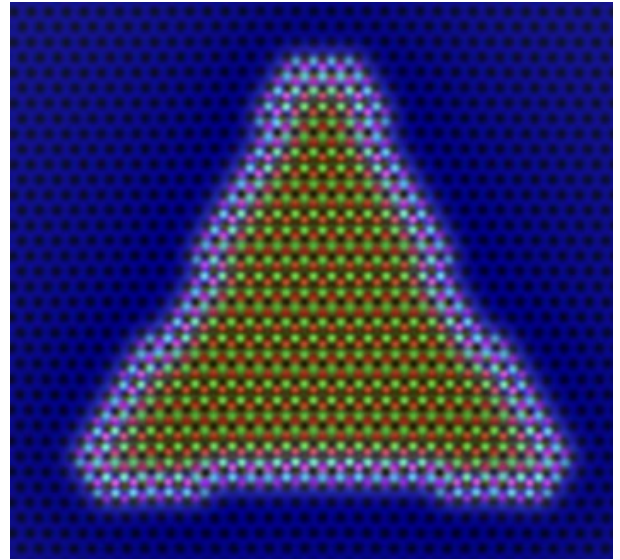

d.

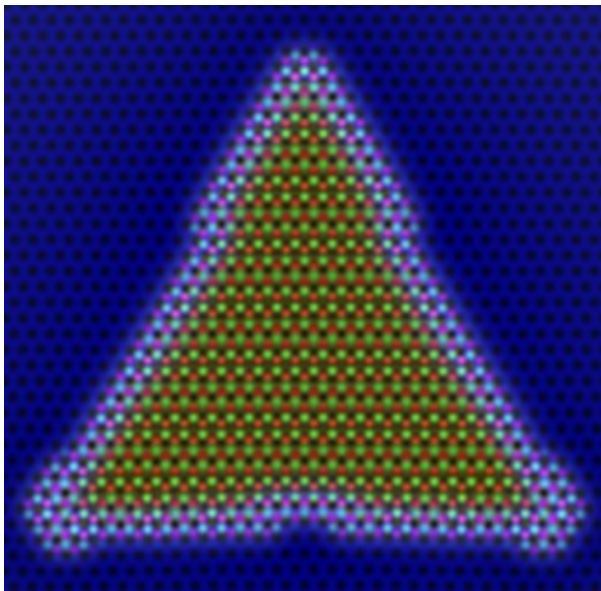

e.

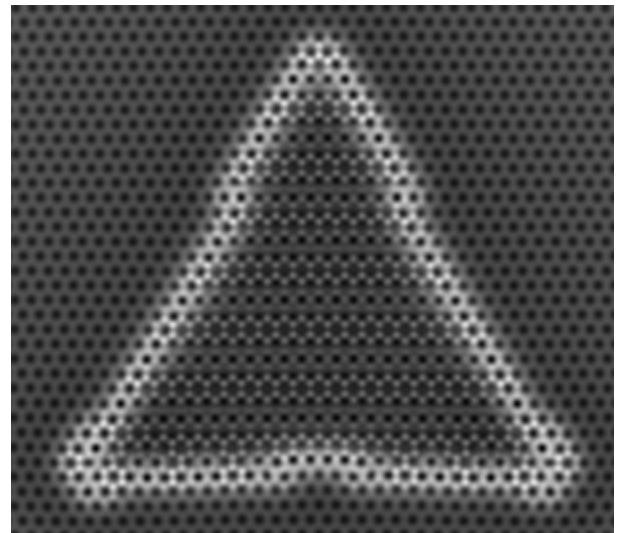

f.

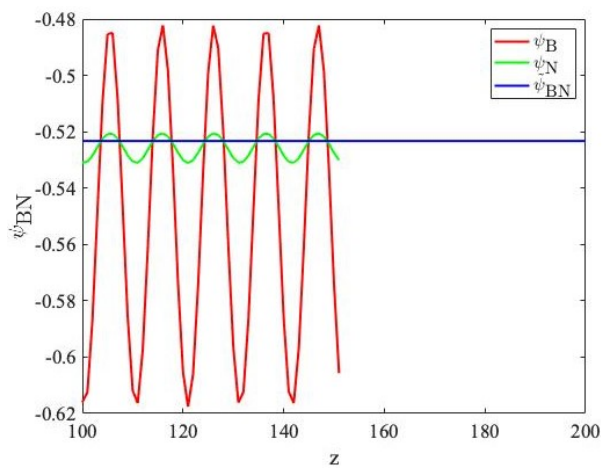

g.

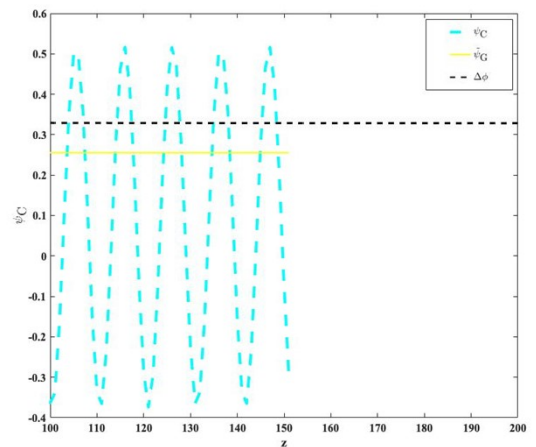

h.



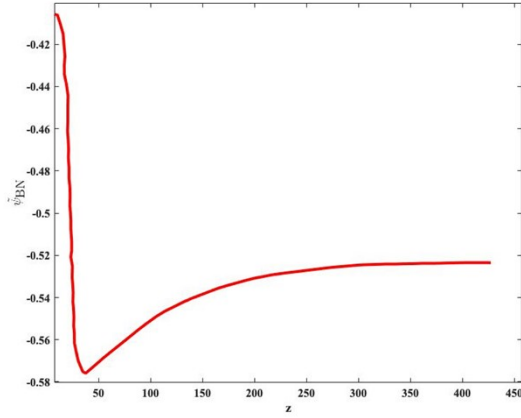

i.

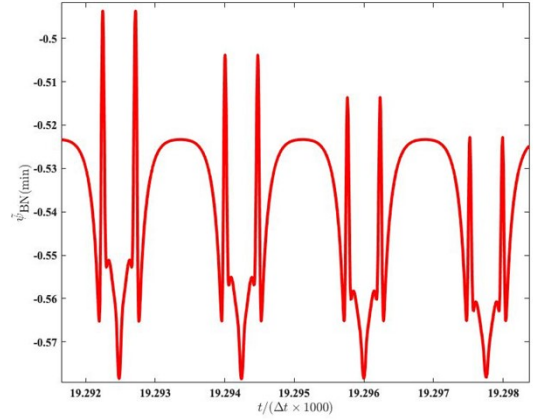

j.

FIG. S.2.1. (a) h-BN seed crystal placed at the center of the simulation box and is surrounded by graphene monolayer at  $0\Delta t$ , (b) a truncated hexagonal h-BN crystal is formed at  $1000\Delta t$ , (c) formation of additional layers around the corners of the truncated hexagonal h-BN crystal at  $4000\Delta t$ , (d) elongation of the truncated h-BN triangle and growth of multiple layers around the edges comprising of boron atoms of the truncated hexagonal h-BN crystal at  $9000\Delta t$ , (e) truncated h-BN triangle with multiple layers around the edges comprising of boron atoms formed at  $10000\Delta t$ . The short and long edges comprise of nitrogen and boron atoms, respectively, (f) density map of the crystal formed at  $10000\Delta t$ , (g) the local particle density for boron,  $\psi_B$  and nitrogen  $\psi_N$  particles, and average particle density,  $\psi_{BN}$  at the growth front, (h) the local particle density for carbon,  $\psi_C$  particle, and average particle density of graphene,  $\psi_G$  at the growth front, where  $Z$  is the distance from the center of the particle, along the horizontal center line of the cluster, (i) shape of the smoothed density profile,  $\psi_{BN}$  on the front of solid-liquid interface at  $10000\Delta t$ , and (j) the minimum density,  $\psi_{BN(min)}$  of the liquid phase on front of solid-liquid interface at  $10000\Delta t$ .

## S.2.2 Example 1 with nitrogen atoms on long edges and boron atoms on short edges

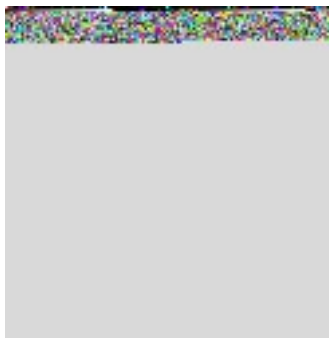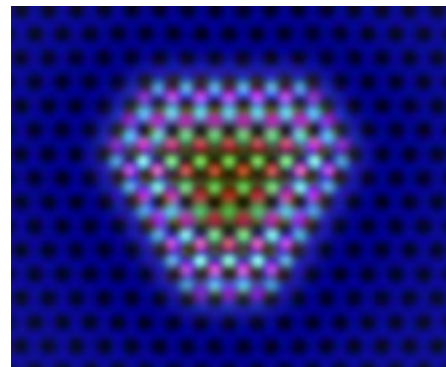

a.

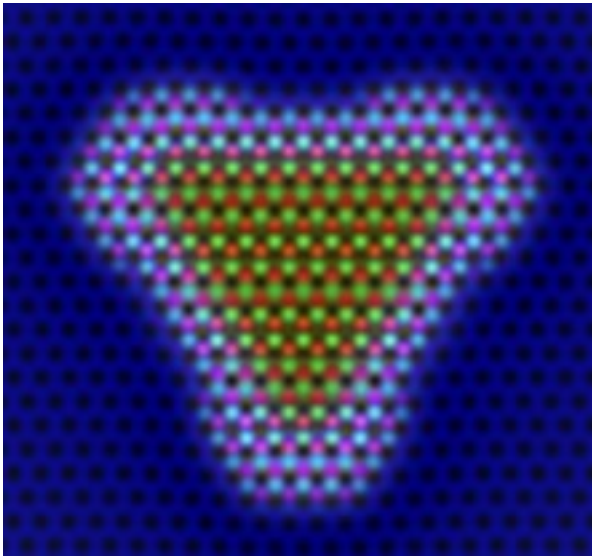

b.

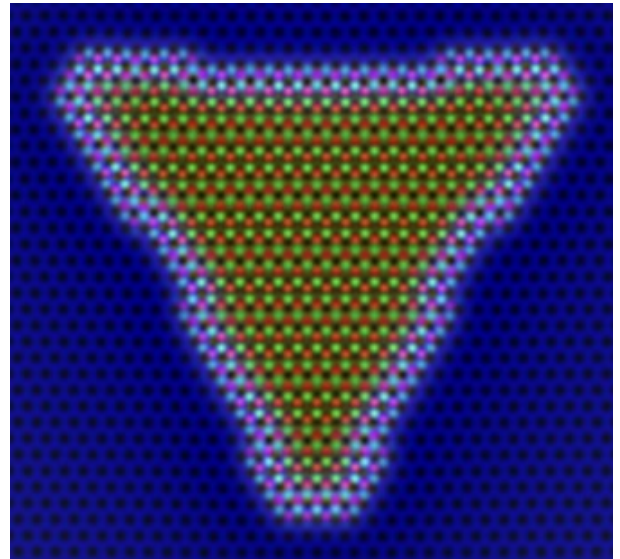

c.

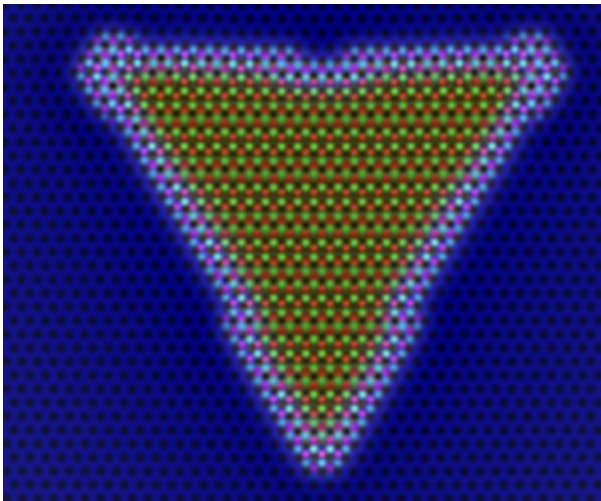

d.

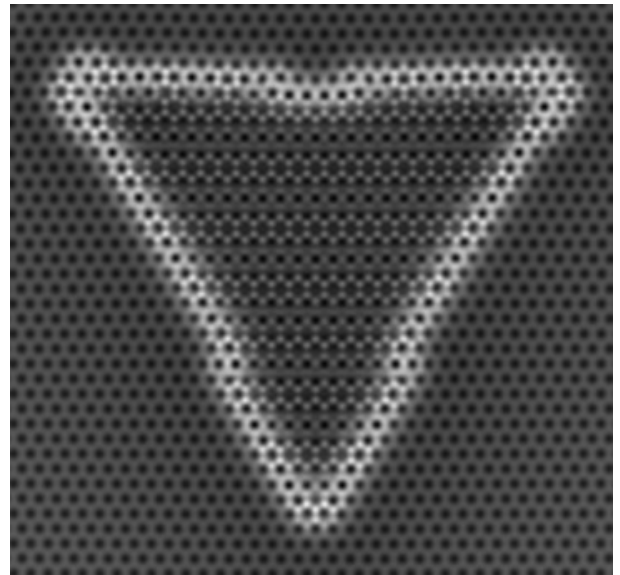

e.

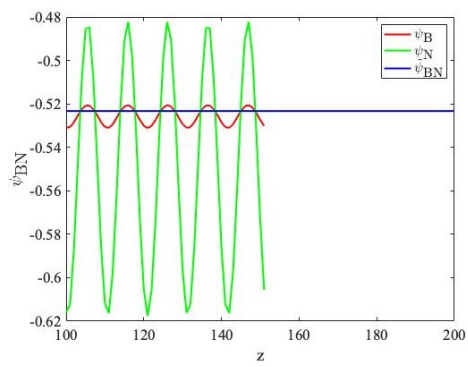

f.

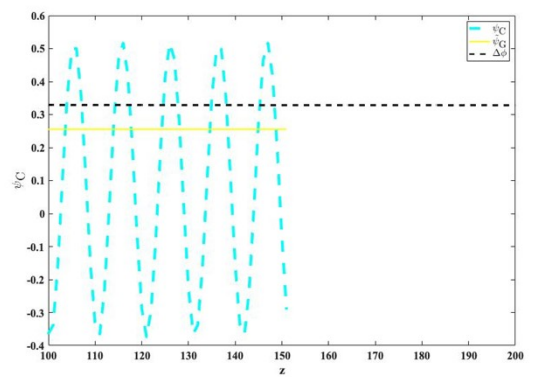

g.

h.

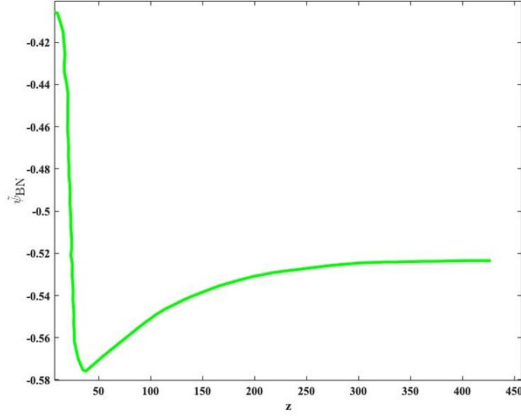

i.

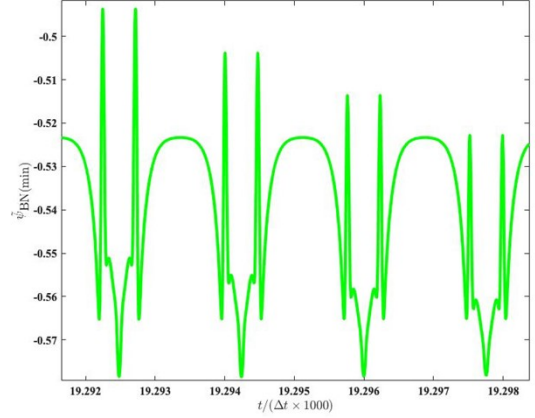

j.

FIG. S.2.2. (a) h-BN seed crystal placed at the center of the simulation box and is surrounded by graphene monolayer at  $0\Delta t$ , (b) a truncated hexagonal h-BN crystal is formed at  $1000\Delta t$ , (c) formation of additional layers around the corners of the truncated hexagonal h-BN crystal at  $4000\Delta t$ , (d) elongation of the truncated h-BN triangle and growth of multiple layers around the edges comprising of boron atoms of the truncated hexagonal h-BN crystal at  $9000\Delta t$ , (e) truncated h-BN triangle with multiple layers around the edges comprising of boron atoms formed at  $10000\Delta t$ . The short and long edges comprise of boron and nitrogen atoms, respectively, (f) density map of the crystal formed at  $10000\Delta t$ , (g) the local particle density for boron,  $\psi_B$  and nitrogen  $\psi_N$  particles, and average particle density,  $\psi_{BN}$  at the growth front, (h) the local particle density for carbon,  $\psi_C$  particle, and average particle density of graphene,  $\psi_G$  at the growth front, where  $Z$  is the distance from the center of the particle, along the horizontal center line of the cluster, (i) shape of the smoothed density profile,  $\psi_{BN}$  on the front of solid-liquid interface at  $10000\Delta t$ , and (j) the minimum density,  $\psi_{BN(min)}$  of the liquid phase on front of solid-liquid interface at  $10000\Delta t$ .

### S.2.3 Example 2 with boron atoms on long edges and nitrogen atoms on short edges

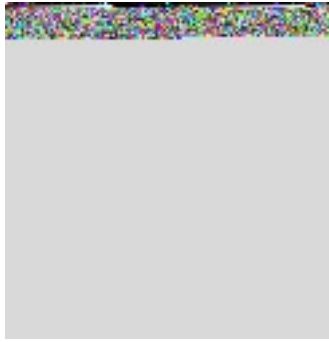

a.

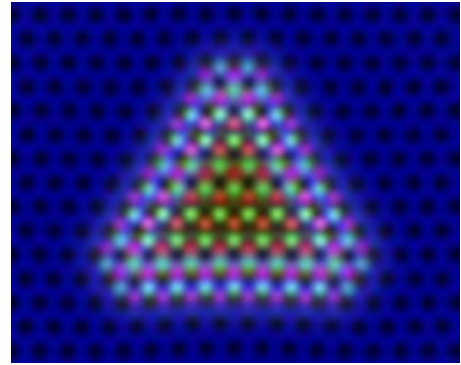

b.

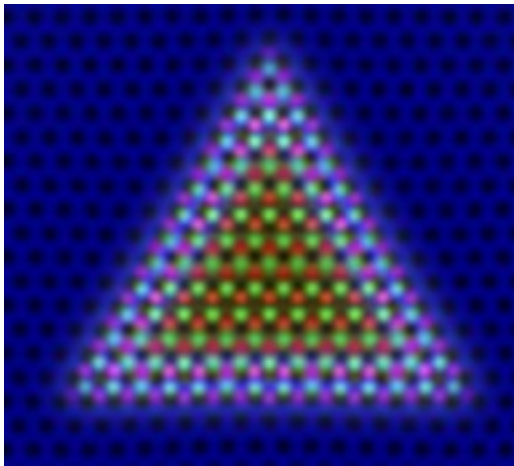

c.

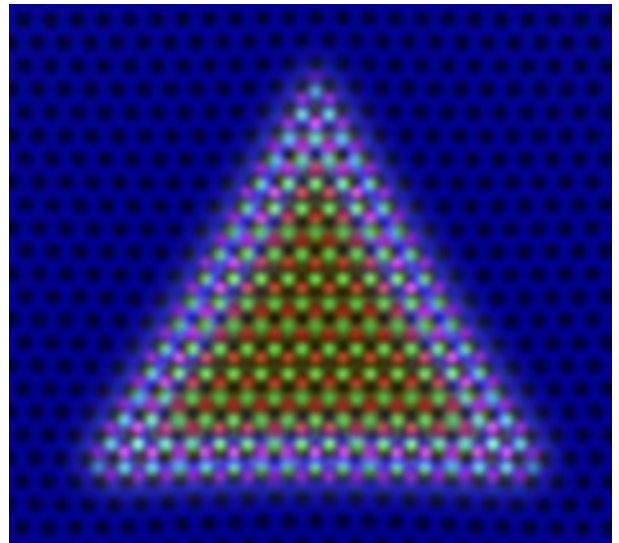

d.

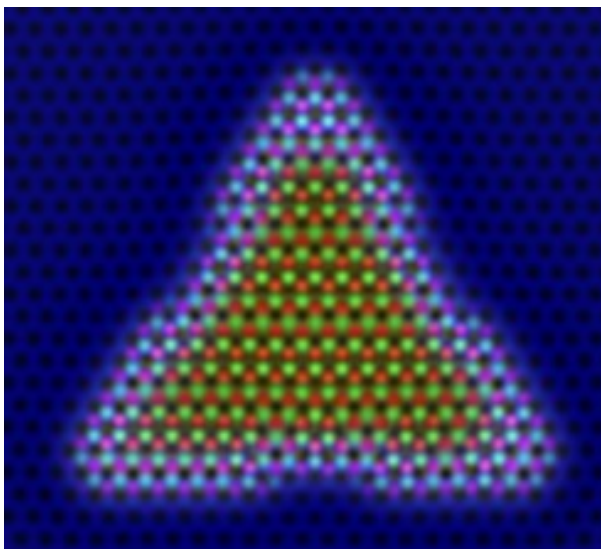

e.

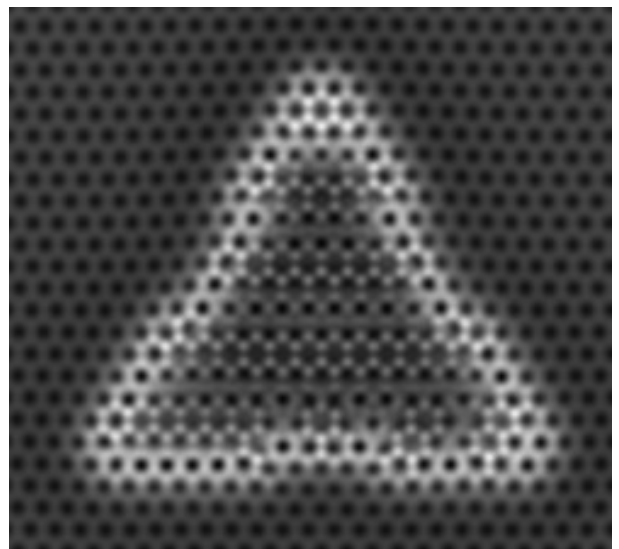

f.

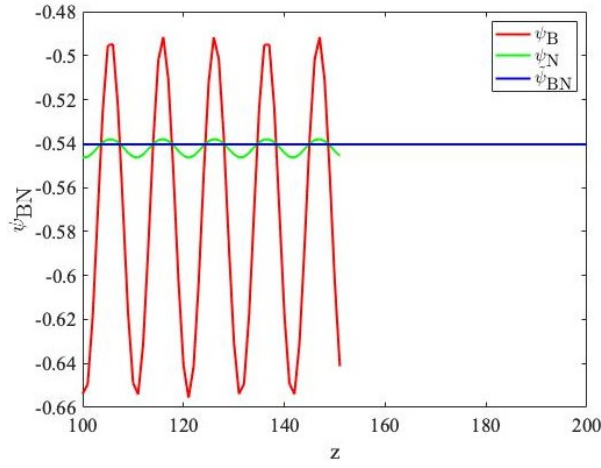

g.

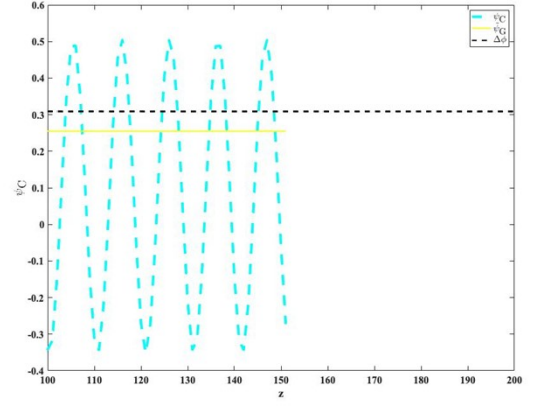

h.

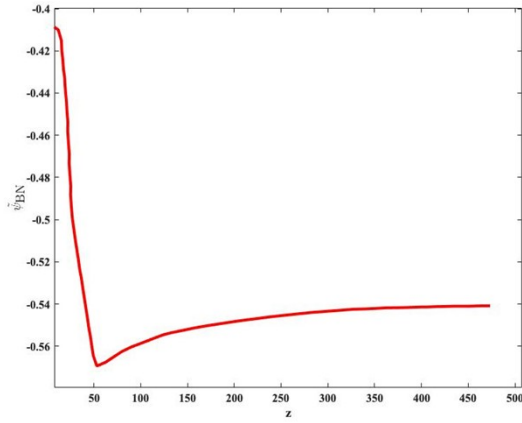

i.

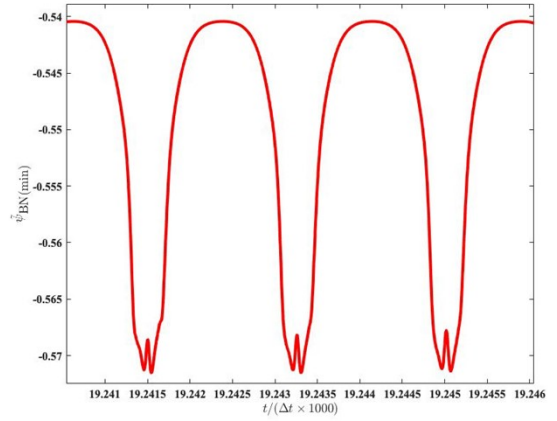

j.

FIG. S.2.3. (a) h-BN seed crystal placed at the center of the simulation box and is surrounded by graphene monolayer at  $0\Delta t$ , (b) formation of truncated hexagonal h-BN crystal at  $3000\Delta t$ , (c) growth of additional layers and formation of a triangular h-BN crystal at  $6000\Delta t$ , (d) increase in the size of h-BN crystal at  $9000\Delta t$ , (e) h-BN triangle with additional single layers formed at  $10000\Delta t$ . The short and long edges comprise of nitrogen and boron atoms, respectively, (f) density map of the crystal formed at  $10000\Delta t$ , (g) the local particle density for boron,  $\psi_B$  and nitrogen  $\psi_N$  particles, and average particle density,  $\psi_{BN}$  at the growth front, (h) the local particle density for carbon,  $\psi_C$  particle, and average particle density of graphene,  $\psi_G$  at the growth front, where  $z$  is the distance from the center of the particle, along the horizontal center line of the cluster, (i) shape of the smoothed density profile,  $\psi_{BN}$  on the front of solid-liquid interface at  $10000\Delta t$ , and (j) the minimum density,  $\psi_{BN(min)}$  of the liquid phase at  $10000\Delta t$ .

#### S.2.4 Example 2 with nitrogen atoms on long edges and boron atoms on short edges



a.

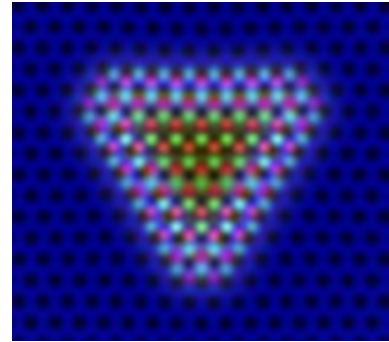

b.

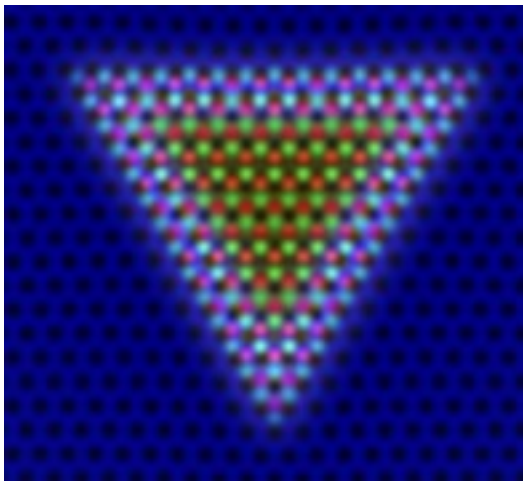

c.

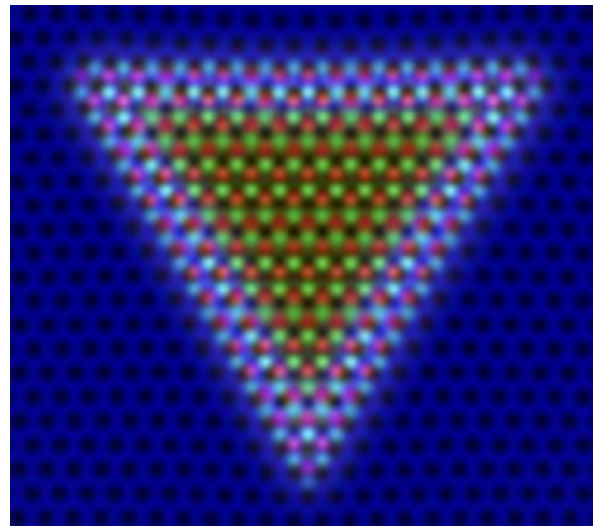

d.

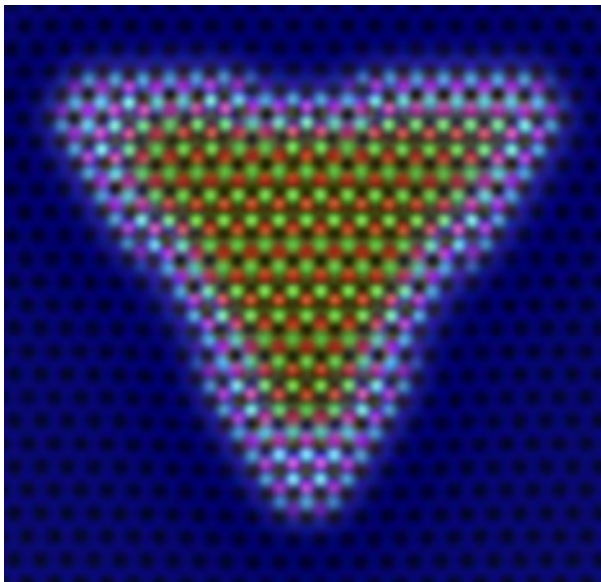

e.

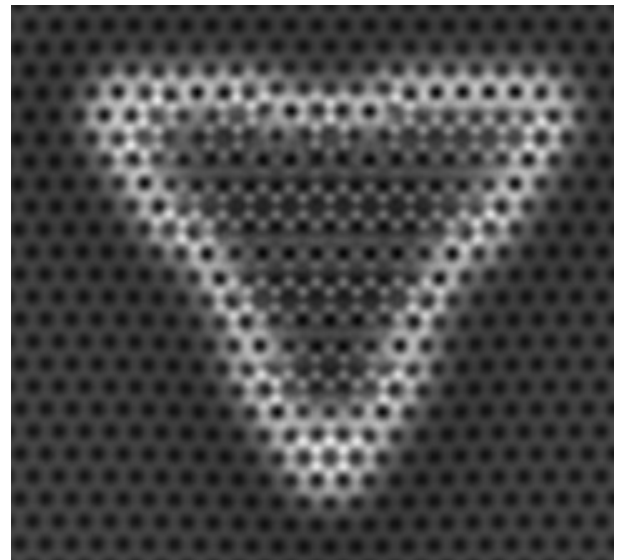

f.

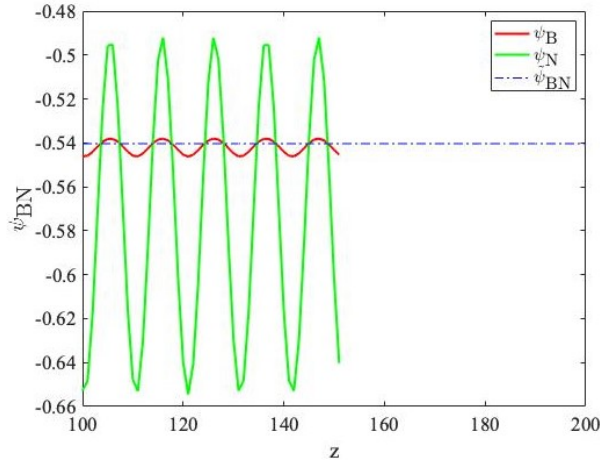

g.

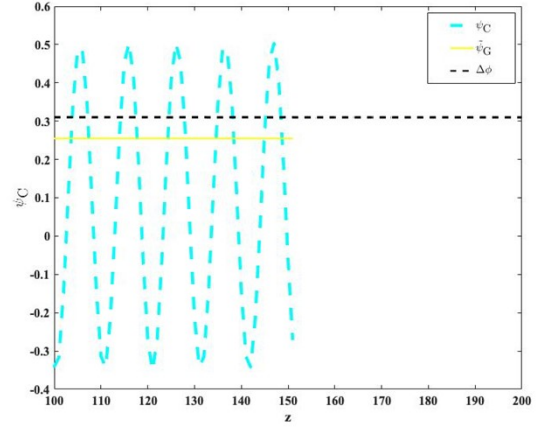

h.

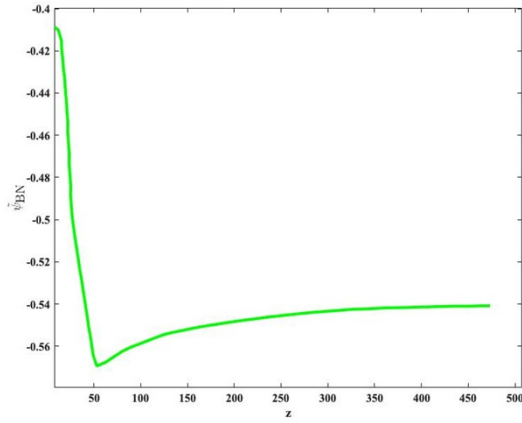

i.

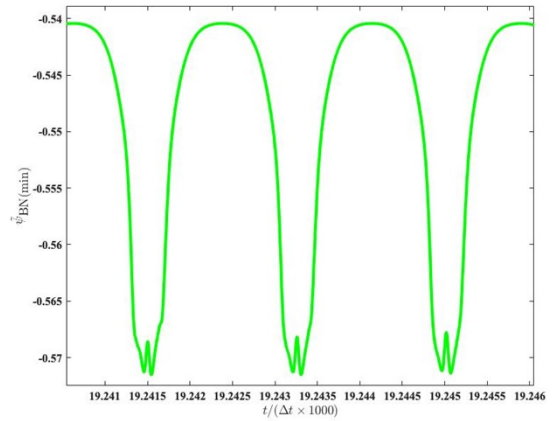

j.

FIG. S.2.4. (a) h-BN seed crystal placed at the center of the simulation box and is surrounded by graphene monolayer at  $0\Delta t$ , (b) formation of truncated hexagonal h-BN crystal at  $3000\Delta t$ , (c) growth of additional layers and formation of a triangular h-BN crystal at  $6000\Delta t$ , (d) increase in the size of h-BN crystal at  $9000\Delta t$ , (e) h-BN triangle with additional single layers formed at  $10000\Delta t$ . The short and long edges comprise of boron and nitrogen atoms, respectively, (f) density map of the crystal formed at  $10000\Delta t$ , (g) the local particle density for boron,  $\psi_B$  and nitrogen  $\psi_N$  particles, and average particle density,  $\psi_{BN}$  at the growth front, (h) the local particle density for carbon,  $\psi_C$  particle, and average particle density of graphene,  $\psi_G$  at the growth front, where  $z$  is the distance from the center of the particle, along the horizontal center line of the cluster, (i) shape of the smoothed density profile,  $\psi_{BN}$  on the front of solid-liquid interface at  $10000\Delta t$ , and (j) the minimum density,  $\psi_{BN(min)}$  of the liquid phase on front of solid-liquid interface at  $10000\Delta t$ .

### S. 2.5 Example 3 with boron atoms on long edges and nitrogen atoms on short edges



a.

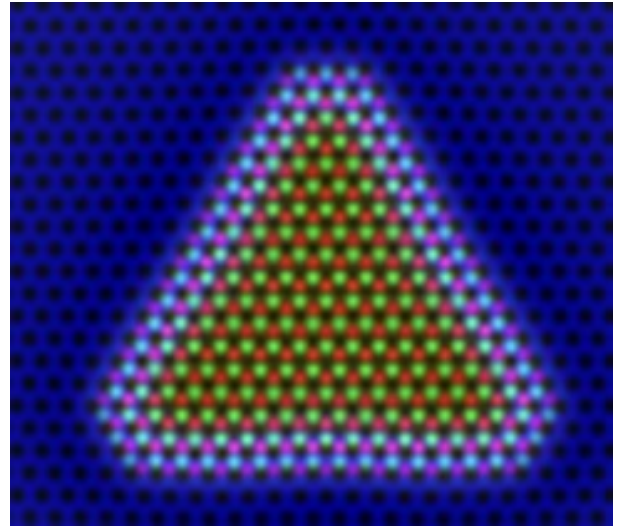

b.

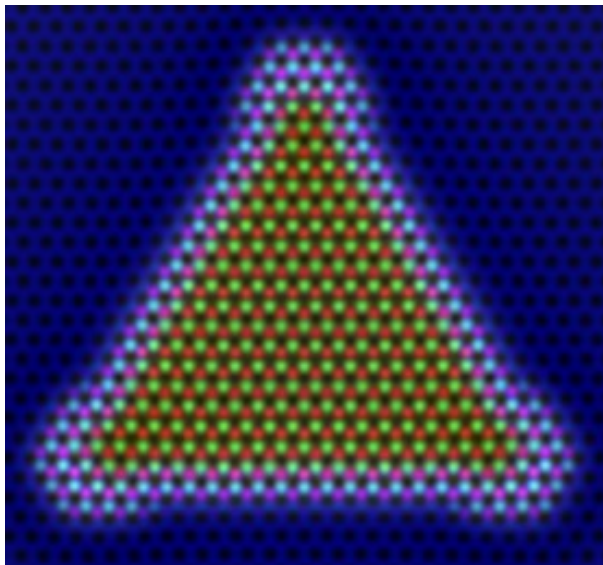

c.

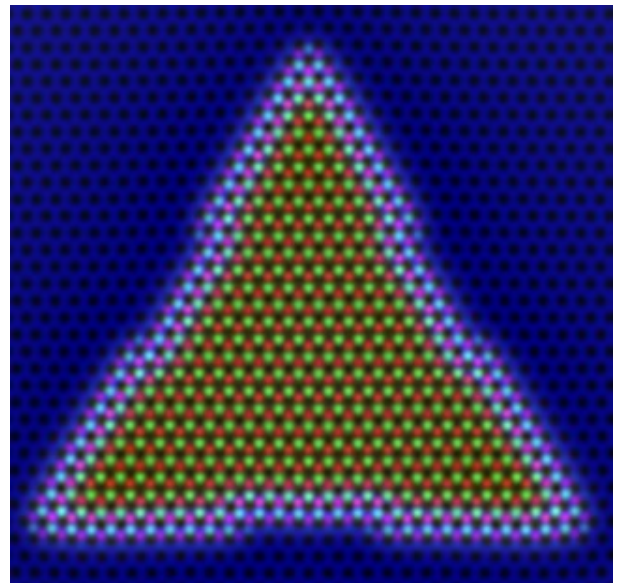

d.

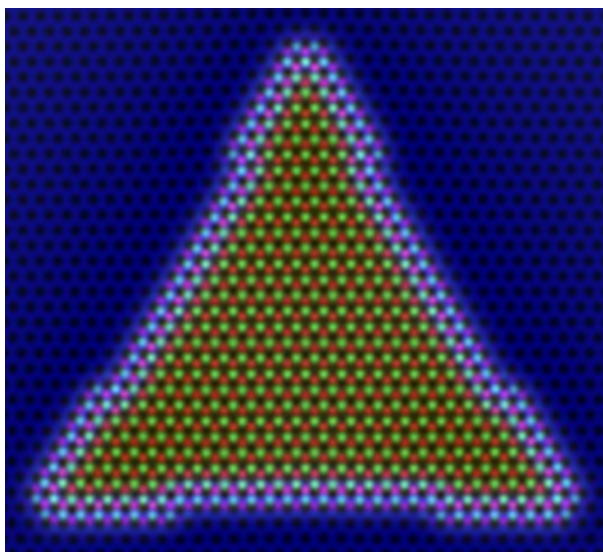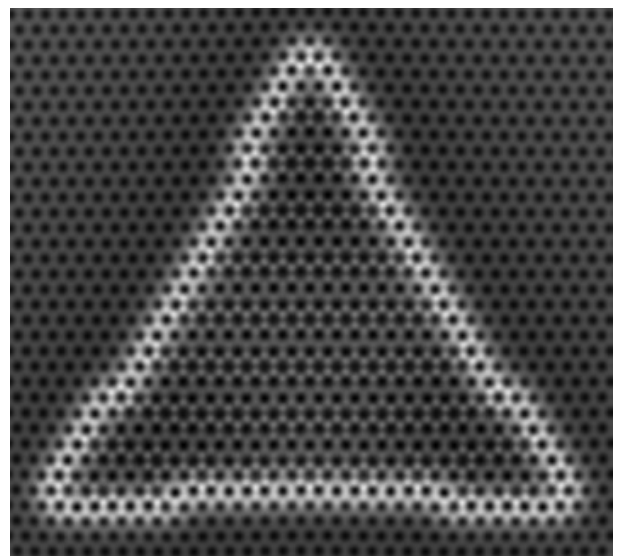



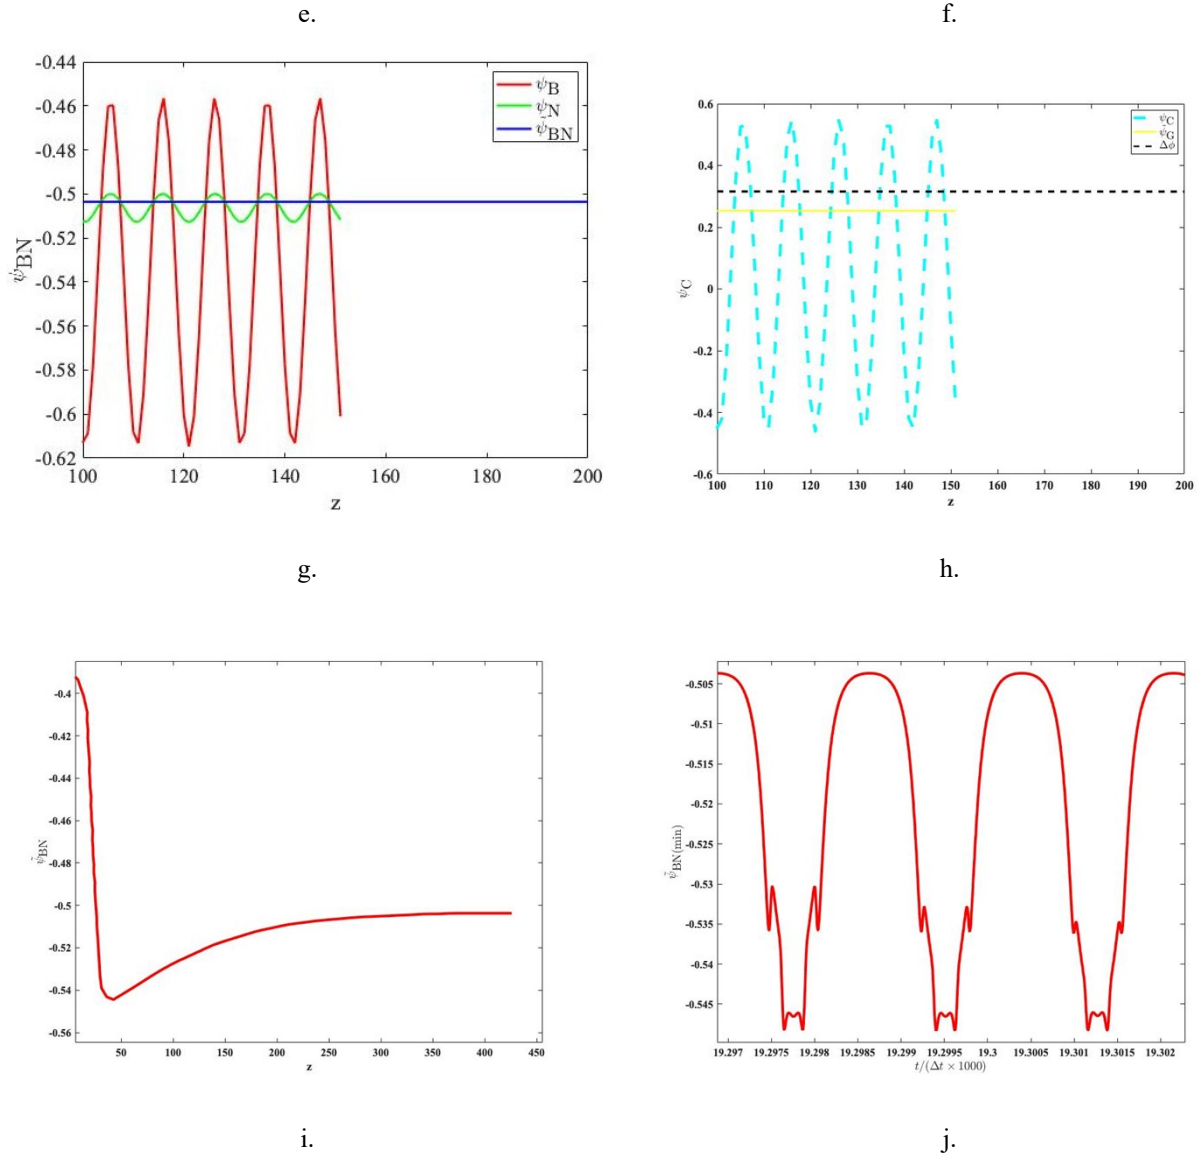

FIG. S.2.5 (a) h-BN seed crystal placed at the center of the simulation box and is surrounded by graphene monolayer at  $0\Delta t$ , (b) formation of truncated hexagonal h-BN crystal at  $4000\Delta t$ , (c) growth of additional layers and formation of a triangular h-BN crystal at  $7000\Delta t$ , (d) increase in the size of h-BN crystal at  $9000\Delta t$ , (e) h-BN triangle with additional single layers formed at  $10000\Delta t$ . The short and long edges comprise of nitrogen and boron atoms, respectively, (f) density map of the crystal formed at  $10000\Delta t$ , (g) the local particle density for boron,  $\psi_B$  and nitrogen  $\psi_N$  particles, and average particle density,  $\psi_{BN}$  at the growth front, (h) the local particle density for carbon,  $\psi_C$  particle, and average particle density of graphene,  $\psi_G$  at the growth front, where  $z$  is the distance from the center of the particle, along the horizontal center line of the cluster, (i) shape of the smoothed density profile,  $\psi_{BN}$  on the front of solid-liquid interface at  $10000\Delta t$ , and (j) the minimum density,  $\psi_{BN}^{(min)}$  of the liquid phase on front of solid-liquid interface at  $10000\Delta t$ .

### S.2.6 Example 3 with nitrogen atoms on long edges and boron atoms on short edges



a.

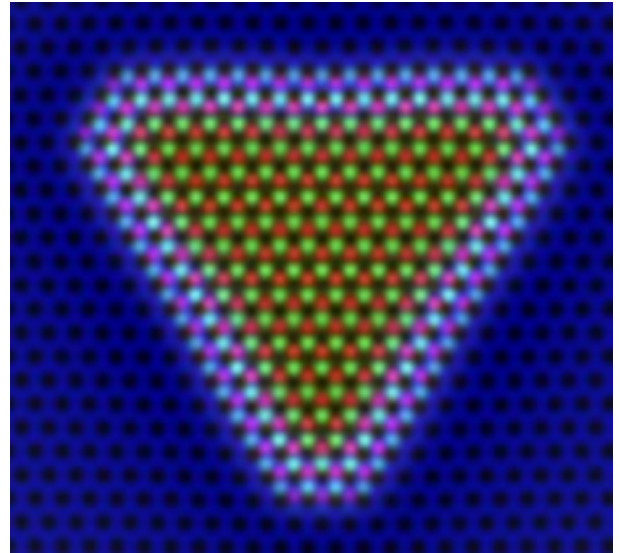

b.

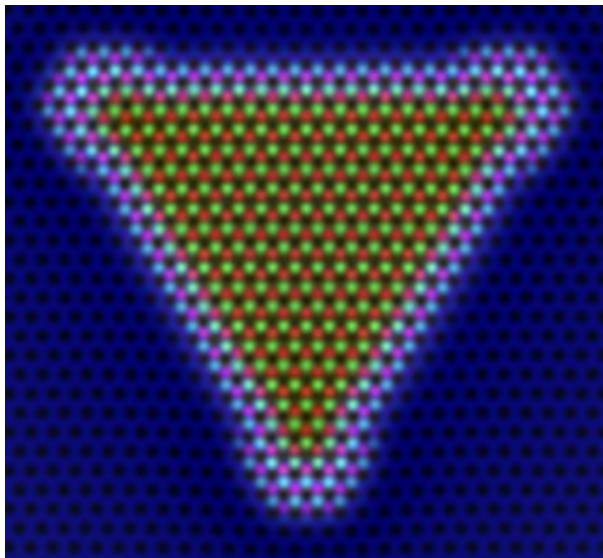

c.

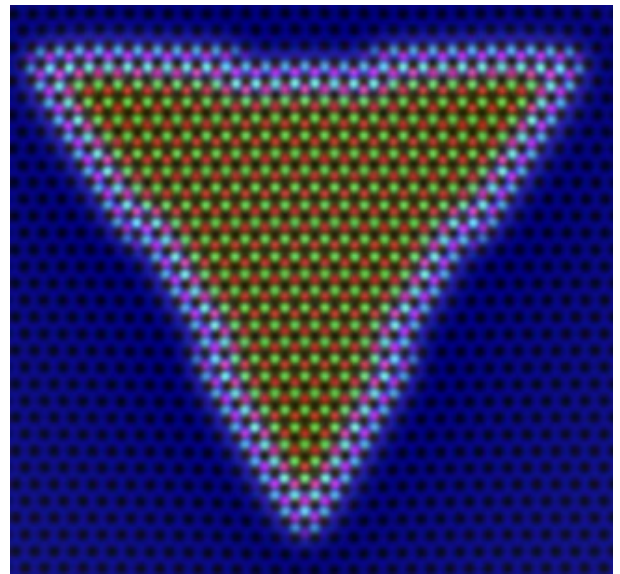

d.

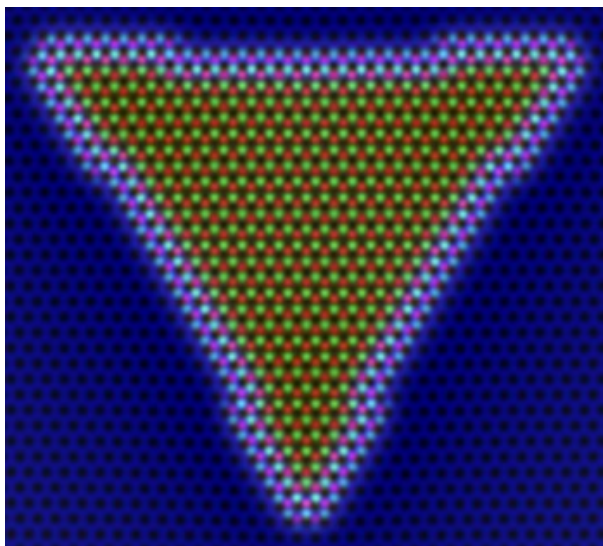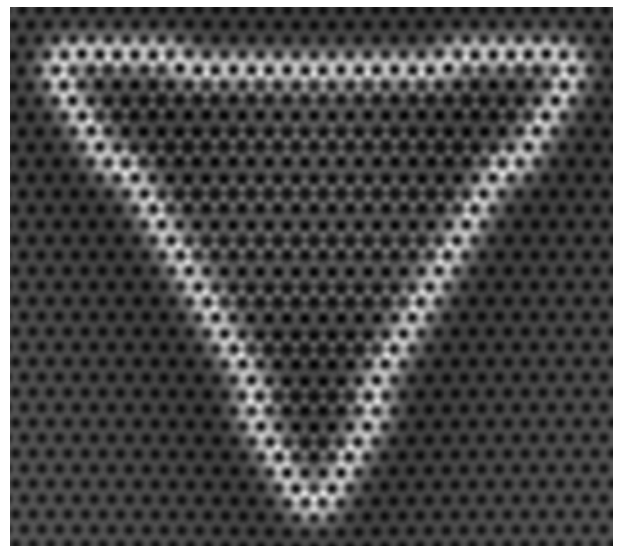

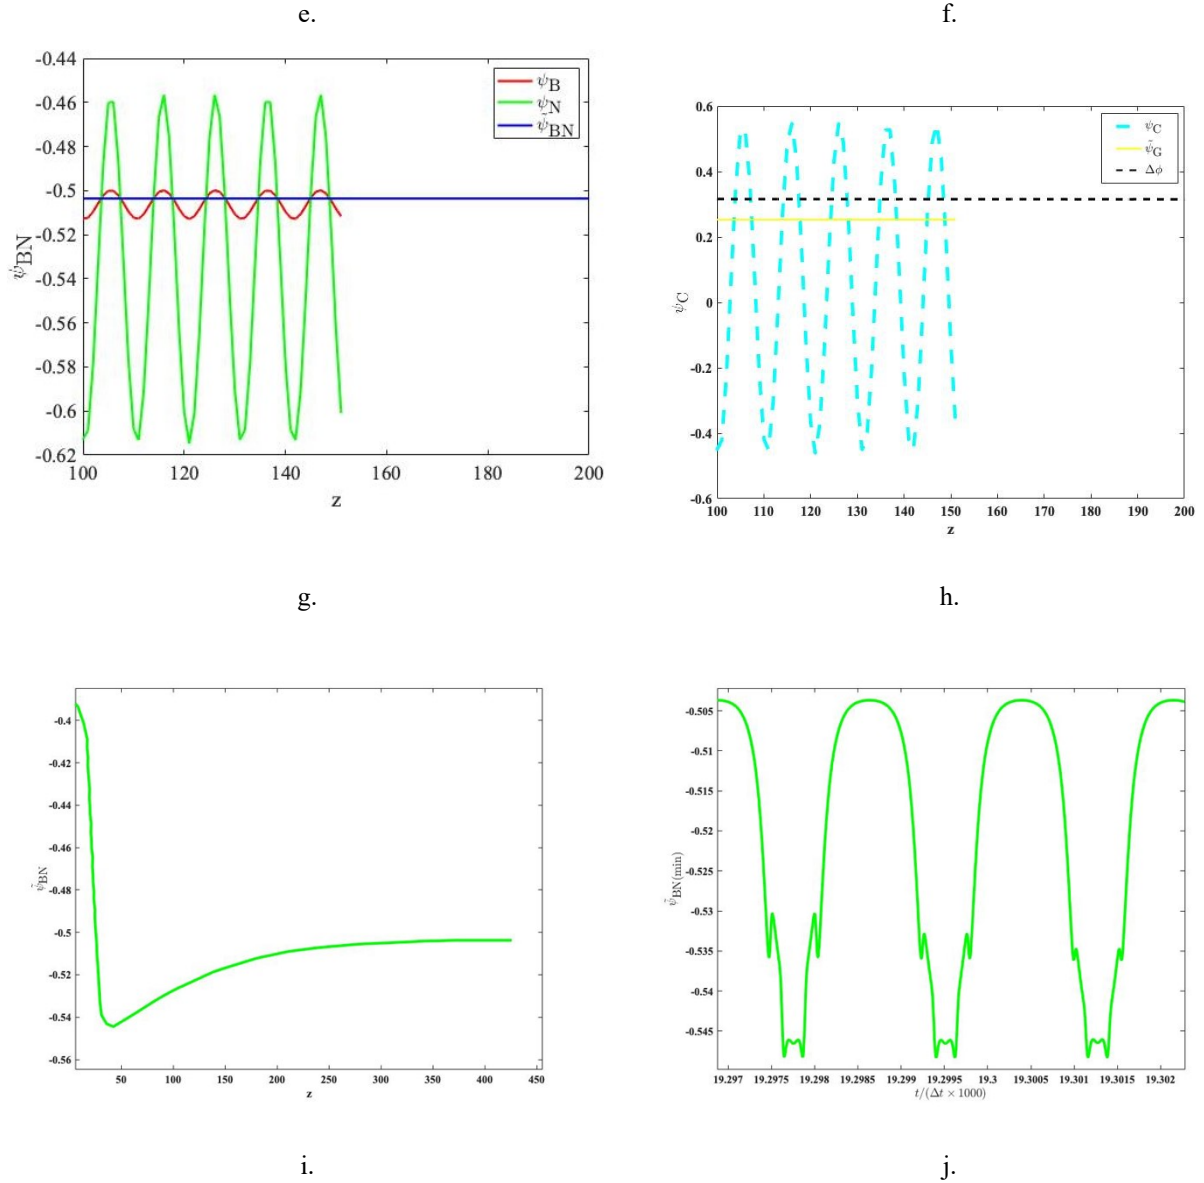

FIG. S. 2.6. (a) h-BN seed crystal placed at the center of the simulation box and is surrounded by graphene monolayer at  $0\Delta t$ , (b) formation of truncated hexagonal h-BN crystal at  $4000\Delta t$ , (c) growth of additional layers and formation of a triangular h-BN crystal at  $7000\Delta t$ , (d) increase in the size of h-BN crystal at  $9000\Delta t$ , (e) h-BN triangle with additional single layers formed at  $10000\Delta t$ . The short and long edges comprise of boron and nitrogen atoms, respectively, (f) density map of the crystal formed at  $10000\Delta t$ , (g) the local particle density for boron,  $\psi_B$  and nitrogen  $\psi_N$  particles, and average particle density,  $\psi_{BN}$  at the growth front, (h) the local particle density for carbon,  $\psi_C$  particle, and average particle density of graphene,  $\psi_G$  at the growth front, where  $z$  is the distance from the center of the particle, along the horizontal center line of the cluster, (i) shape of the smoothed density profile,  $\psi_{BN}$  on the front of solid-liquid interface at  $10000\Delta t$ , and (j) the minimum density,  $\psi_{BN(min)}$  of the liquid phase on front of solid-liquid interface at  $10000\Delta t$ .
